# Supplementary material for: A Role for B Cells to Transmit Hepatitis C Virus Infection
Source: Front Immunol. 2021 Dec 16;12:775098. doi: 10.3389/fimmu.2021.775098 (PMC8716873; doi:10.3389/fimmu.2021.775098)
Supplement: Supplementary file 2 [file DataSheet_2.xlsx]

## Sheet: Blad1
			Submisson No.s and clones	Gene bank accession No.s
			BankIt2413693 E1E2-gt1a-P02-clone292	MW416014
			BankIt2413693 E1E2-gt1a-P02-clone293	MW416015
			BankIt2413693 E1E2-gt1a-P02-clone294	MW416016
			BankIt2413693 E1E2-gt1a-P02-clone296	MW416017
			BankIt2413693 E1E2-gt1a-P02-clone298	MW416018
			BankIt2413693 E1E2-gt1a-P02-clone300	MW416019
			BankIt2413693 E1E2-gt1a-P02-clone302	MW416020
			BankIt2413693 E1E2-gt1a-P02-clone310	MW416021
			BankIt2413693 E1E2-gt1a-P02-clone311	MW416022
			BankIt2413693 E1E2-gt1a-P02-clone313	MW416023
			BankIt2413693 E1E2-gt1a-P02-clone314	MW416024
			BankIt2413693 E1E2-gt1a-P02-clone609	MW416025
			BankIt2413693 E1E2-gt1a-P02-clone610	MW416026
			BankIt2413693 E1E2-gt1a-P02-clone611	MW416027
			BankIt2413693 E1E2-gt1a-P02-clone612	MW416028
			BankIt2413693 E1E2-gt1a-P02-clone613	MW416029
			BankIt2413693 E1E2-gt1a-P02-clone614	MW416030
			BankIt2413693 E1E2-gt1a-P02-clone616	MW416031
			BankIt2413693 E1E2-gt1a-P02-clone617	MW416032
			BankIt2413693 E1E2-gt1a-P02-clone618	MW416033
			BankIt2413693 E1E2-gt1a-P02-clone619	MW416034
			BankIt2413693 E1E2-gt1a-P02-clone620	MW416035
			BankIt2413693 E1E2-gt1a-P02-clone621	MW416036
			BankIt2413693 E1E2-gt1a-P02-clone622	MW416037
			BankIt2413693 E1E2-gt1a-P02-clone623	MW416038
			BankIt2413693 E1E2-gt1a-P02-clone624	MW416039
			BankIt2413693 E1E2-gt1a-P02-clone625	MW416040
			BankIt2413693 E1E2-gt1a-P02-clone626	MW416041
			BankIt2413693 E1E2-gt1a-P02-clone627	MW416042
			BankIt2413693 E1E2-gt1a-P02-clone628	MW416043
			BankIt2413693 E1E2-gt1a-P02-clone629	MW416044
			BankIt2413693 E1E2-gt1a-P02-clone630	MW416045
			BankIt2413693 E1E2-gt1a-P02-clone631	MW416046
			BankIt2413714 E1E2-gt1a-P03-clone571	MW416047
			BankIt2413714 E1E2-gt1a-P03-clone572	MW416048
			BankIt2413714 E1E2-gt1a-P03-clone573	MW416049
			BankIt2413714 E1E2-gt1a-P03-clone574	MW416050
			BankIt2413714 E1E2-gt1a-P03-clone575	MW416051
			BankIt2413714 E1E2-gt1a-P03-clone576	MW416052
			BankIt2413714 E1E2-gt1a-P03-clone577	MW416053
			BankIt2413714 E1E2-gt1a-P03-clone578	MW416054
			BankIt2413714 E1E2-gt1a-P03-clone580	MW416055
			BankIt2413714 E1E2-gt1a-P03-clone1569	MW416056
			BankIt2413714 E1E2-gt1a-P03-clone1572	MW416057
			BankIt2413714 E1E2-gt1a-P03-clone1574	MW416058
			BankIt2413714 E1E2-gt1a-P03-clone1956	MW416059
			BankIt2413714 E1E2-gt1a-P03-clone1957	MW416060
			BankIt2413714 E1E2-gt1a-P03-clone1958	MW416061
			BankIt2413714 E1E2-gt1a-P03-clone1959	MW416062
			BankIt2413714 E1E2-gt1a-P03-clone1960	MW416063
			BankIt2413714 E1E2-gt1a-P03-clone1961	MW416064
			BankIt2413714 E1E2-gt1a-P03-clone1962	MW416065
			BankIt2413714 E1E2-gt1a-P03-clone1963	MW416066
			BankIt2413714 E1E2-gt1a-P03-clone1964	MW416067
			BankIt2413714 E1E2-gt1a-P03-clone1965	MW416068
			BankIt2413714 E1E2-gt1a-P03-clone1966	MW416069
			BankIt2413714 E1E2-gt1a-P03-clone1967	MW416070
			BankIt2413714 E1E2-gt1a-P03-clone1968	MW416071
			BankIt2413714 E1E2-gt1a-P03-clone1969	MW416072
			BankIt2413714 E1E2-gt1a-P03-clone1970	MW416073
			BankIt2413714 E1E2-gt1a-P03-clone1972	MW416074
			BankIt2413714 E1E2-gt1a-P03-clone1973	MW416075
			BankIt2413714 E1E2-gt1a-P03-clone1975	MW416076
			BankIt2413714 E1E2-gt1a-P03-clone1976	MW416077
			BankIt2413714 E1E2-gt1a-P03-clone1977	MW416078
			BankIt2413714 E1E2-gt1a-P03-clone1978	MW416079
			BankIt2413714 E1E2-gt1a-P03-clone1979	MW416080
			BankIt2413714 E1E2-gt1a-P03-clone1980	MW416081
			BankIt2413714 E1E2-gt1a-P03-clone1981	MW416082
			BankIt2413714 E1E2-gt1a-P03-clone1982	MW416083
			BankIt2413714 E1E2-gt1a-P03-clone2345	MW416084
			BankIt2413714 E1E2-gt1a-P03-clone2346	MW416085
			BankIt2413714 E1E2-gt1a-P03-clone2347	MW416086
			BankIt2413714 E1E2-gt1a-P03-clone2348	MW416087
			BankIt2413714 E1E2-gt1a-P03-clone2350	MW416088
			BankIt2413714 E1E2-gt1a-P03-clone2351	MW416089
			BankIt2413714 E1E2-gt1a-P03-clone2352	MW416090
			BankIt2413714 E1E2-gt1a-P03-clone2353	MW416091
			BankIt2413714 E1E2-gt1a-P03-clone2354	MW416092
			BankIt2413714 E1E2-gt1a-P03-clone2355	MW416093
			BankIt2413724 E1E2-gt1a-P04-clone315	MW416094
			BankIt2413724 E1E2-gt1a-P04-clone316	MW416095
			BankIt2413724 E1E2-gt1a-P04-clone420	MW416096
			BankIt2413724 E1E2-gt1a-P04-clone421	MW416097
			BankIt2413724 E1E2-gt1a-P04-clone422	MW416098
			BankIt2413724 E1E2-gt1a-P04-clone423	MW416099
			BankIt2413724 E1E2-gt1a-P04-clone424	MW416100
			BankIt2413724 E1E2-gt1a-P04-clone425	MW416101
			BankIt2413724 E1E2-gt1a-P04-clone426	MW416102
			BankIt2413724 E1E2-gt1a-P04-clone427	MW416103
			BankIt2413724 E1E2-gt1a-P04-clone428	MW416104
			BankIt2413724 E1E2-gt1a-P04-clone429	MW416105
			BankIt2413724 E1E2-gt1a-P04-clone430	MW416106
			BankIt2413724 E1E2-gt1a-P04-clone431	MW416107
			BankIt2413724 E1E2-gt1a-P04-clone432	MW416108
			BankIt2413724 E1E2-gt1a-P04-clone433	MW416109
			BankIt2413724 E1E2-gt1a-P04-clone434	MW416110
			BankIt2413724 E1E2-gt1a-P04-clone435	MW416111
			BankIt2413724 E1E2-gt1a-P04-clone436	MW416112
			BankIt2413724 E1E2-gt1a-P04-clone437	MW416113
			BankIt2413724 E1E2-gt1a-P04-clone438	MW416114
			BankIt2413724 E1E2-gt1a-P04-clone439	MW416115
			BankIt2413724 E1E2-gt1a-P04-clone440	MW416116
			BankIt2413724 E1E2-gt1a-P04-clone441	MW416117
			BankIt2413724 E1E2-gt1a-P04-clone442	MW416118
			BankIt2413724 E1E2-gt1a-P04-clone443	MW416119
			BankIt2413724 E1E2-gt1a-P04-clone444	MW416120
			BankIt2413724 E1E2-gt1a-P04-clone972	MW416121
			BankIt2413724 E1E2-gt1a-P04-clone973	MW416122
			BankIt2413724 E1E2-gt1a-P04-clone974	MW416123
			BankIt2413724 E1E2-gt1a-P04-clone975	MW416124
			BankIt2413724 E1E2-gt1a-P04-clone977	MW416125
			BankIt2413724 E1E2-gt1a-P04-clone978	MW416126
			BankIt2413724 E1E2-gt1a-P04-clone979	MW416127
			BankIt2413724 E1E2-gt1a-P04-clone982	MW416128
			BankIt2413724 E1E2-gt1a-P04-clone984	MW416129
			BankIt2413724 E1E2-gt1a-P04-clone1576	MW416130
			BankIt2413724 E1E2-gt1a-P04-clone1577	MW416131
			BankIt2413724 E1E2-gt1a-P04-clone1578	MW416132
			BankIt2413724 E1E2-gt1a-P04-clone1579	MW416133
			BankIt2413724 E1E2-gt1a-P04-clone1580	MW416134
			BankIt2413724 E1E2-gt1a-P04-clone1581	MW416135
			BankIt2413724 E1E2-gt1a-P04-clone1582	MW416136
			BankIt2413724 E1E2-gt1a-P04-clone1586	MW416137
			BankIt2413724 E1E2-gt1a-P04-clone1587	MW416138
			BankIt2413724 E1E2-gt1a-P04-clone1588	MW416139
			BankIt2413724 E1E2-gt1a-P04-clone1589	MW416140
			BankIt2413724 E1E2-gt1a-P04-clone1590	MW416141
			BankIt2413724 E1E2-gt1a-P04-clone2122	MW416142
			BankIt2413724 E1E2-gt1a-P04-clone2123	MW416143
			BankIt2413724 E1E2-gt1a-P04-clone2127	MW416144
			BankIt2413724 E1E2-gt1a-P04-clone2128	MW416145
			BankIt2413724 E1E2-gt1a-P04-clone2129	MW416146
			BankIt2413724 E1E2-gt1a-P04-clone2130	MW416147
			BankIt2413724 E1E2-gt1a-P04-clone2134	MW416148
			BankIt2413724 E1E2-gt1a-P04-clone2135	MW416149
			BankIt2413724 E1E2-gt1a-P04-clone2143	MW416150
			BankIt2413724 E1E2-gt1a-P04-clone2146	MW416151
			BankIt2413724 E1E2-gt1a-P04-clone2148	MW416152
			BankIt2413724 E1E2-gt1a-P04-clone2149	MW416153
			BankIt2413724 E1E2-gt1a-P04-clone2151	MW416154
			BankIt2413724 E1E2-gt1a-P04-clone2152	MW416155
			BankIt2413724 E1E2-gt1a-P04-clone2153	MW416156
			BankIt2413724 E1E2-gt1a-P04-clone2154	MW416157
			BankIt2413733 E1E2-gt1a-P05-clone587	MW416158
			BankIt2413733 E1E2-gt1a-P05-clone588	MW416159
			BankIt2413733 E1E2-gt1a-P05-clone589	MW416160
			BankIt2413733 E1E2-gt1a-P05-clone590	MW416161
			BankIt2413733 E1E2-gt1a-P05-clone591	MW416162
			BankIt2413733 E1E2-gt1a-P05-clone592	MW416163
			BankIt2413733 E1E2-gt1a-P05-clone593	MW416164
			BankIt2413733 E1E2-gt1a-P05-clone594	MW416165
			BankIt2413733 E1E2-gt1a-P05-clone595	MW416166
			BankIt2413733 E1E2-gt1a-P05-clone596	MW416167
			BankIt2413733 E1E2-gt1a-P05-clone597	MW416168
			BankIt2413733 E1E2-gt1a-P05-clone598	MW416169
			BankIt2413733 E1E2-gt1a-P05-clone599	MW416170
			BankIt2413733 E1E2-gt1a-P05-clone600	MW416171
			BankIt2413733 E1E2-gt1a-P05-clone601	MW416172
			BankIt2413733 E1E2-gt1a-P05-clone602	MW416173
			BankIt2413733 E1E2-gt1a-P05-clone603	MW416174
			BankIt2413733 E1E2-gt1a-P05-clone604	MW416175
			BankIt2413733 E1E2-gt1a-P05-clone606	MW416176
			BankIt2413733 E1E2-gt1a-P05-clone608	MW416177
			BankIt2413733 E1E2-gt1a-P05-clone660	MW416178
			BankIt2413733 E1E2-gt1a-P05-clone661	MW416179
			BankIt2413733 E1E2-gt1a-P05-clone662	MW416180
			BankIt2413733 E1E2-gt1a-P05-clone663	MW416181
			BankIt2413733 E1E2-gt1a-P05-clone664	MW416182
			BankIt2413733 E1E2-gt1a-P05-clone665	MW416183
			BankIt2413733 E1E2-gt1a-P05-clone666	MW416184
			BankIt2413733 E1E2-gt1a-P05-clone667	MW416185
			BankIt2413733 E1E2-gt1a-P05-clone668	MW416186
			BankIt2413733 E1E2-gt1a-P05-clone669	MW416187
			BankIt2413733 E1E2-gt1a-P05-clone670	MW416188
			BankIt2413733 E1E2-gt1a-P05-clone671	MW416189
			BankIt2413733 E1E2-gt1a-P05-clone672	MW416190
			BankIt2413733 E1E2-gt1a-P05-clone899	MW416191
			BankIt2413733 E1E2-gt1a-P05-clone900	MW416192
			BankIt2413733 E1E2-gt1a-P05-clone901	MW416193
			BankIt2413733 E1E2-gt1a-P05-clone903	MW416194
			BankIt2413733 E1E2-gt1a-P05-clone904	MW416195
			BankIt2413733 E1E2-gt1a-P05-clone905	MW416196
			BankIt2413733 E1E2-gt1a-P05-clone906	MW416197
			BankIt2413733 E1E2-gt1a-P05-clone907	MW416198
			BankIt2413733 E1E2-gt1a-P05-clone909	MW416199
			BankIt2413733 E1E2-gt1a-P05-clone910	MW416200
			BankIt2413733 E1E2-gt1a-P05-clone911	MW416201
			BankIt2413733 E1E2-gt1a-P05-clone912	MW416202
			BankIt2413733 E1E2-gt1a-P05-clone913	MW416203
			BankIt2413733 E1E2-gt1a-P05-clone915	MW416204
			BankIt2413733 E1E2-gt1a-P05-clone916	MW416205
			BankIt2413733 E1E2-gt1a-P05-clone917	MW416206
			BankIt2413733 E1E2-gt1a-P05-clone918	MW416207
			BankIt2413733 E1E2-gt1a-P05-clone919	MW416208
			BankIt2413733 E1E2-gt1a-P05-clone920	MW416209
			BankIt2413733 E1E2-gt1a-P05-clone961	MW416210
			BankIt2413733 E1E2-gt1a-P05-clone963	MW416211
			BankIt2413733 E1E2-gt1a-P05-clone964	MW416212
			BankIt2413733 E1E2-gt1a-P05-clone965	MW416213
			BankIt2413733 E1E2-gt1a-P05-clone966	MW416214
			BankIt2413733 E1E2-gt1a-P05-clone1334	MW416215
			BankIt2413733 E1E2-gt1a-P05-clone1335	MW416216
			BankIt2413733 E1E2-gt1a-P05-clone1339	MW416217
			BankIt2413741 E1E2-gt1b-P06-clone1014	MW416218
			BankIt2413741 E1E2-gt1b-P06-clone1015	MW416219
			BankIt2413741 E1E2-gt1b-P06-clone1016	MW416220
			BankIt2413741 E1E2-gt1b-P06-clone1017	MW416221
			BankIt2413741 E1E2-gt1b-P06-clone1018	MW416222
			BankIt2413741 E1E2-gt1b-P06-clone1019	MW416223
			BankIt2413741 E1E2-gt1b-P06-clone1020	MW416224
			BankIt2413741 E1E2-gt1b-P06-clone1021	MW416225
			BankIt2413741 E1E2-gt1b-P06-clone1022	MW416226
			BankIt2413741 E1E2-gt1b-P06-clone1023	MW416227
			BankIt2413741 E1E2-gt1b-P06-clone1024	MW416228
			BankIt2413741 E1E2-gt1b-P06-clone1028	MW416229
			BankIt2413741 E1E2-gt1b-P06-clone1029	MW416230
			BankIt2413741 E1E2-gt1b-P06-clone1031	MW416231
			BankIt2413741 E1E2-gt1b-P06-clone1032	MW416232
			BankIt2413741 E1E2-gt1b-P06-clone1034	MW416233
			BankIt2413741 E1E2-gt1b-P06-clone1035	MW416234
			BankIt2413741 E1E2-gt1b-P06-clone1381	MW416235
			BankIt2413741 E1E2-gt1b-P06-clone1384	MW416236
			BankIt2413741 E1E2-gt1b-P06-clone1385	MW416237
			BankIt2413741 E1E2-gt1b-P06-clone1390	MW416238
			BankIt2413741 E1E2-gt1b-P06-clone1391	MW416239
			BankIt2413741 E1E2-gt1b-P06-clone1392	MW416240
			BankIt2413741 E1E2-gt1b-P06-clone1395	MW416241
			BankIt2413741 E1E2-gt1b-P06-clone1396	MW416242
			BankIt2413741 E1E2-gt1b-P06-clone1397	MW416243
			BankIt2413741 E1E2-gt1b-P06-clone1398	MW416244
			BankIt2413741 E1E2-gt1b-P06-clone1399	MW416245
			BankIt2413741 E1E2-gt1b-P06-clone1400	MW416246
			BankIt2413741 E1E2-gt1b-P06-clone1402	MW416247
			BankIt2413741 E1E2-gt1b-P06-clone1406	MW416248
			BankIt2413741 E1E2-gt1b-P06-clone1411	MW416249
			BankIt2413741 E1E2-gt1b-P06-clone1412	MW416250
			BankIt2413741 E1E2-gt1b-P06-clone1413	MW416251
			BankIt2413741 E1E2-gt1b-P06-clone1414	MW416252
			BankIt2413741 E1E2-gt1b-P06-clone1661	MW416253
			BankIt2413741 E1E2-gt1b-P06-clone1663	MW416254
			BankIt2413741 E1E2-gt1b-P06-clone1983	MW416255
			BankIt2413741 E1E2-gt1b-P06-clone1986	MW416256
			BankIt2413741 E1E2-gt1b-P06-clone2538	MW416257
			BankIt2413741 E1E2-gt1b-P06-clone2540	MW416258
			BankIt2413741 E1E2-gt1b-P06-clone2542	MW416259
			BankIt2413741 E1E2-gt1b-P06-clone2543	MW416260
			BankIt2413955 E1E2-gt1b-P07-clone640	MW416261
			BankIt2413955 E1E2-gt1b-P07-clone642	MW416262
			BankIt2413955 E1E2-gt1b-P07-clone643	MW416263
			BankIt2413955 E1E2-gt1b-P07-clone644	MW416264
			BankIt2413955 E1E2-gt1b-P07-clone645	MW416265
			BankIt2413955 E1E2-gt1b-P07-clone646	MW416266
			BankIt2413955 E1E2-gt1b-P07-clone647	MW416267
			BankIt2413955 E1E2-gt1b-P07-clone649	MW416268
			BankIt2413955 E1E2-gt1b-P07-clone650	MW416269
			BankIt2413955 E1E2-gt1b-P07-clone651	MW416270
			BankIt2413955 E1E2-gt1b-P07-clone652	MW416271
			BankIt2413955 E1E2-gt1b-P07-clone653	MW416272
			BankIt2413955 E1E2-gt1b-P07-clone655	MW416273
			BankIt2413955 E1E2-gt1b-P07-clone656	MW416274
			BankIt2413955 E1E2-gt1b-P07-clone988	MW416275
			BankIt2413955 E1E2-gt1b-P07-clone989	MW416276
			BankIt2413955 E1E2-gt1b-P07-clone990	MW416277
			BankIt2413955 E1E2-gt1b-P07-clone991	MW416278
			BankIt2413955 E1E2-gt1b-P07-clone992	MW416279
			BankIt2413955 E1E2-gt1b-P07-clone993	MW416280
			BankIt2413955 E1E2-gt1b-P07-clone995	MW416281
			BankIt2413955 E1E2-gt1b-P07-clone996	MW416282
			BankIt2413955 E1E2-gt1b-P07-clone998	MW416283
			BankIt2413955 E1E2-gt1b-P07-clone999	MW416284
			BankIt2413955 E1E2-gt1b-P07-clone1000	MW416285
			BankIt2413955 E1E2-gt1b-P07-clone1001	MW416286
			BankIt2413955 E1E2-gt1b-P07-clone1003	MW416287
			BankIt2413955 E1E2-gt1b-P07-clone1004	MW416288
			BankIt2413955 E1E2-gt1b-P07-clone1559	MW416289
			BankIt2413955 E1E2-gt1b-P07-clone1560	MW416290
			BankIt2413955 E1E2-gt1b-P07-clone1563	MW416291
			BankIt2413955 E1E2-gt1b-P07-clone1567	MW416292
			BankIt2413955 E1E2-gt1b-P07-clone1599	MW416293
			BankIt2413955 E1E2-gt1b-P07-clone1600	MW416294
			BankIt2413955 E1E2-gt1b-P07-clone1601	MW416295
			BankIt2413955 E1E2-gt1b-P07-clone1602	MW416296
			BankIt2413955 E1E2-gt1b-P07-clone1606	MW416297
			BankIt2413955 E1E2-gt1b-P07-clone1607	MW416298
			BankIt2413955 E1E2-gt1b-P07-clone1609	MW416299
			BankIt2413955 E1E2-gt1b-P07-clone1610	MW416300
			BankIt2413955 E1E2-gt1b-P07-clone1611	MW416301
			BankIt2413955 E1E2-gt1b-P07-clone1612	MW416302
			BankIt2413955 E1E2-gt1b-P07-clone1614	MW416303
			BankIt2413955 E1E2-gt1b-P07-clone1616	MW416304
			BankIt2413955 E1E2-gt1b-P07-clone1618	MW416305
			BankIt2413955 E1E2-gt1b-P07-clone1620	MW416306
			BankIt2413955 E1E2-gt1b-P07-clone1621	MW416307
			BankIt2413955 E1E2-gt1b-P07-clone1623	MW416308
			BankIt2413955 E1E2-gt1b-P07-clone1624	MW416309
			BankIt2413955 E1E2-gt1b-P07-clone1626	MW416310
			BankIt2413955 E1E2-gt1b-P07-clone1629	MW416311
			BankIt2413955 E1E2-gt1b-P07-clone2112	MW416312
			BankIt2413955 E1E2-gt1b-P07-clone2113	MW416313
			BankIt2413955 E1E2-gt1b-P07-clone2516	MW416314
			BankIt2413955 E1E2-gt1b-P07-clone2517	MW416315
			BankIt2413955 E1E2-gt1b-P07-clone2519	MW416316
			BankIt2413955 E1E2-gt1b-P07-clone2520	MW416317
			BankIt2413955 E1E2-gt1b-P07-clone2523	MW416318
			BankIt2413955 E1E2-gt1b-P07-clone2525	MW416319
			BankIt2413967 E1E2-gt1b-P08-2010-clone456	MW416320
			BankIt2413967 E1E2-gt1b-P08-2010-clone457	MW416321
			BankIt2413967 E1E2-gt1b-P08-2010-clone458	MW416322
			BankIt2413967 E1E2-gt1b-P08-2010-clone459	MW416323
			BankIt2413967 E1E2-gt1b-P08-2010-clone460	MW416324
			BankIt2413967 E1E2-gt1b-P08-2010-clone461	MW416325
			BankIt2413967 E1E2-gt1b-P08-2010-clone462	MW416326
			BankIt2413967 E1E2-gt1b-P08-2010-clone465	MW416327
			BankIt2413967 E1E2-gt1b-P08-2010-clone466	MW416328
			BankIt2413967 E1E2-gt1b-P08-2010-clone468	MW416329
			BankIt2413967 E1E2-gt1b-P08-2010-clone469	MW416330
			BankIt2413967 E1E2-gt1b-P08-2010-clone470	MW416331
			BankIt2413967 E1E2-gt1b-P08-2010-clone471	MW416332
			BankIt2413967 E1E2-gt1b-P08-2010-clone472	MW416333
			BankIt2413967 E1E2-gt1b-P08-2010-clone474	MW416334
			BankIt2413967 E1E2-gt1b-P08-2010-clone475	MW416335
			BankIt2413967 E1E2-gt1b-P08-2010-clone477	MW416336
			BankIt2413967 E1E2-gt1b-P08-2010-clone478	MW416337
			BankIt2413967 E1E2-gt1b-P08-2010-clone479	MW416338
			BankIt2413967 E1E2-gt1b-P08-2010-clone480	MW416339
			BankIt2413967 E1E2-gt1b-P08-2010-clone481	MW416340
			BankIt2413967 E1E2-gt1b-P08-2010-clone483	MW416341
			BankIt2413967 E1E2-gt1b-P08-2010-clone499	MW416342
			BankIt2413967 E1E2-gt1b-P08-2010-clone500	MW416343
			BankIt2413967 E1E2-gt1b-P08-2010-clone501	MW416344
			BankIt2413967 E1E2-gt1b-P08-2010-clone502	MW416345
			BankIt2413967 E1E2-gt1b-P08-2010-clone503	MW416346
			BankIt2413967 E1E2-gt1b-P08-2010-clone504	MW416347
			BankIt2413967 E1E2-gt1b-P08-2010-clone505	MW416348
			BankIt2413967 E1E2-gt1b-P08-2010-clone558	MW416349
			BankIt2413967 E1E2-gt1b-P08-2010-clone559	MW416350
			BankIt2413967 E1E2-gt1b-P08-2010-clone560	MW416351
			BankIt2413967 E1E2-gt1b-P08-2010-clone561	MW416352
			BankIt2413967 E1E2-gt1b-P08-2010-clone562	MW416353
			BankIt2413967 E1E2-gt1b-P08-2010-clone563	MW416354
			BankIt2413967 E1E2-gt1b-P08-2010-clone564	MW416355
			BankIt2413967 E1E2-gt1b-P08-2010-clone565	MW416356
			BankIt2413967 E1E2-gt1b-P08-2010-clone709	MW416357
			BankIt2413967 E1E2-gt1b-P08-2010-clone710	MW416358
			BankIt2413967 E1E2-gt1b-P08-2010-clone711	MW416359
			BankIt2413967 E1E2-gt1b-P08-2010-clone712	MW416360
			BankIt2413967 E1E2-gt1b-P08-2010-clone713	MW416361
			BankIt2413967 E1E2-gt1b-P08-2010-clone714	MW416362
			BankIt2413967 E1E2-gt1b-P08-2010-clone715	MW416363
			BankIt2413967 E1E2-gt1b-P08-2010-clone716	MW416364
			BankIt2413967 E1E2-gt1b-P08-2010-clone717	MW416365
			BankIt2413967 E1E2-gt1b-P08-2010-clone718	MW416366
			BankIt2413967 E1E2-gt1b-P08-2010-clone719	MW416367
			BankIt2413967 E1E2-gt1b-P08-2010-clone720	MW416368
			BankIt2413967 E1E2-gt1b-P08-2010-clone722	MW416369
			BankIt2413967 E1E2-gt1b-P08-2010-clone723	MW416370
			BankIt2413967 E1E2-gt1b-P08-2010-clone724	MW416371
			BankIt2413967 E1E2-gt1b-P08-2010-clone725	MW416372
			BankIt2413967 E1E2-gt1b-P08-2010-clone726	MW416373
			BankIt2413967 E1E2-gt1b-P08-2010-clone727	MW416374
			BankIt2413967 E1E2-gt1b-P08-2010-clone728	MW416375
			BankIt2413967 E1E2-gt1b-P08-2010-clone729	MW416376
			BankIt2413967 E1E2-gt1b-P08-2010-clone730	MW416377
			BankIt2413967 E1E2-gt1b-P08-2010-clone822	MW416378
			BankIt2413967 E1E2-gt1b-P08-2010-clone921	MW416379
			BankIt2413967 E1E2-gt1b-P08-2010-clone922	MW416380
			BankIt2413967 E1E2-gt1b-P08-2010-clone923	MW416381
			BankIt2413967 E1E2-gt1b-P08-2010-clone925	MW416382
			BankIt2413967 E1E2-gt1b-P08-2010-clone926	MW416383
			BankIt2413967 E1E2-gt1b-P08-2010-clone927	MW416384
			BankIt2413967 E1E2-gt1b-P08-2010-clone928	MW416385
			BankIt2413967 E1E2-gt1b-P08-2010-clone929	MW416386
			BankIt2413967 E1E2-gt1b-P08-2010-clone930	MW416387
			BankIt2413967 E1E2-gt1b-P08-2010-clone931	MW416388
			BankIt2413967 E1E2-gt1b-P08-2010-clone932	MW416389
			BankIt2413967 E1E2-gt1b-P08-2010-clone933	MW416390
			BankIt2413967 E1E2-gt1b-P08-2010-clone934	MW416391
			BankIt2413967 E1E2-gt1b-P08-2010-clone936	MW416392
			BankIt2413967 E1E2-gt1b-P08-2010-clone937	MW416393
			BankIt2413967 E1E2-gt1b-P08-2010-clone938	MW416394
			BankIt2413967 E1E2-gt1b-P08-2010-clone939	MW416395
			BankIt2413967 E1E2-gt1b-P08-2010-clone940	MW416396
			BankIt2413967 E1E2-gt1b-P08-2010-clone941	MW416397
			BankIt2413967 E1E2-gt1b-P08-2010-clone942	MW416398
			BankIt2413967 E1E2-gt1b-P08-2010-clone943	MW416399
			BankIt2413967 E1E2-gt1b-P08-2010-clone944	MW416400
			BankIt2413967 E1E2-gt1b-P08-2010-clone945	MW416401
			BankIt2413967 E1E2-gt1b-P08-2010-clone946	MW416402
			BankIt2413967 E1E2-gt1b-P08-2010-clone948	MW416403
			BankIt2413967 E1E2-gt1b-P08-2010-clone949	MW416404
			BankIt2413967 E1E2-gt1b-P08-2010-clone950	MW416405
			BankIt2413967 E1E2-gt1b-P08-2010-clone951	MW416406
			BankIt2413967 E1E2-gt1b-P08-2010-clone952	MW416407
			BankIt2413967 E1E2-gt1b-P08-2010-clone953	MW416408
			BankIt2413967 E1E2-gt1b-P08-2010-clone954	MW416409
			BankIt2413967 E1E2-gt1b-P08-2010-clone955	MW416410
			BankIt2413967 E1E2-gt1b-P08-2010-clone956	MW416411
			BankIt2413967 E1E2-gt1b-P08-2010-clone958	MW416412
			BankIt2413967 E1E2-gt1b-P08-2010-clone960	MW416413
			BankIt2413967 E1E2-gt1b-P08-2010-clone1114	MW416414
			BankIt2413967 E1E2-gt1b-P08-2010-clone1115	MW416415
			BankIt2413967 E1E2-gt1b-P08-2010-clone1116	MW416416
			BankIt2413967 E1E2-gt1b-P08-2010-clone1117	MW416417
			BankIt2413967 E1E2-gt1b-P08-2010-clone1118	MW416418
			BankIt2413967 E1E2-gt1b-P08-2010-clone1119	MW416419
			BankIt2413967 E1E2-gt1b-P08-2010-clone1120	MW416420
			BankIt2413967 E1E2-gt1b-P08-2010-clone1121	MW416421
			BankIt2413967 E1E2-gt1b-P08-2010-clone1123	MW416422
			BankIt2413967 E1E2-gt1b-P08-2010-clone1124	MW416423
			BankIt2413967 E1E2-gt1b-P08-2010-clone1125	MW416424
			BankIt2413967 E1E2-gt1b-P08-2010-clone1126	MW416425
			BankIt2413967 E1E2-gt1b-P08-2010-clone1127	MW416426
			BankIt2413967 E1E2-gt1b-P08-2010-clone1128	MW416427
			BankIt2413967 E1E2-gt1b-P08-2010-clone1129	MW416428
			BankIt2413967 E1E2-gt1b-P08-2010-clone1130	MW416429
			BankIt2413967 E1E2-gt1b-P08-2010-clone1132	MW416430
			BankIt2413967 E1E2-gt1b-P08-2010-clone1438	MW416431
			BankIt2413967 E1E2-gt1b-P08-2010-clone1439	MW416432
			BankIt2413967 E1E2-gt1b-P08-2010-clone1440	MW416433
			BankIt2413967 E1E2-gt1b-P08-2010-clone1443	MW416434
			BankIt2413967 E1E2-gt1b-P08-2010-clone1444	MW416435
			BankIt2413967 E1E2-gt1b-P08-2010-clone1446	MW416436
			BankIt2413967 E1E2-gt1b-P08-2010-clone1447	MW416437
			BankIt2413967 E1E2-gt1b-P08-2010-clone1449	MW416438
			BankIt2413967 E1E2-gt1b-P08-2010-clone1500	MW416439
			BankIt2413967 E1E2-gt1b-P08-2010-clone1501	MW416440
			BankIt2413967 E1E2-gt1b-P08-2010-clone1502	MW416441
			BankIt2413967 E1E2-gt1b-P08-2010-clone1503	MW416442
			BankIt2413967 E1E2-gt1b-P08-2010-clone1504	MW416443
			BankIt2413967 E1E2-gt1b-P08-2010-clone1505	MW416444
			BankIt2413967 E1E2-gt1b-P08-2010-clone1506	MW416445
			BankIt2413967 E1E2-gt1b-P08-2010-clone1507	MW416446
			BankIt2413967 E1E2-gt1b-P08-2010-clone1508	MW416447
			BankIt2413967 E1E2-gt1b-P08-2010-clone1509	MW416448
			BankIt2413967 E1E2-gt1b-P08-2010-clone1510	MW416449
			BankIt2413967 E1E2-gt1b-P08-2010-clone1513	MW416450
			BankIt2413967 E1E2-gt1b-P08-2010-clone1514	MW416451
			BankIt2413967 E1E2-gt1b-P08-2010-clone1515	MW416452
			BankIt2413967 E1E2-gt1b-P08-2010-clone1516	MW416453
			BankIt2413967 E1E2-gt1b-P08-2010-clone1517	MW416454
			BankIt2413967 E1E2-gt1b-P08-2010-clone1518	MW416455
			BankIt2413967 E1E2-gt1b-P08-2010-clone1519	MW416456
			BankIt2413967 E1E2-gt1b-P08-2010-clone1520	MW416457
			BankIt2413967 E1E2-gt1b-P08-2010-clone1521	MW416458
			BankIt2413967 E1E2-gt1b-P08-2010-clone1522	MW416459
			BankIt2413967 E1E2-gt1b-P08-2010-clone1523	MW416460
			BankIt2413967 E1E2-gt1b-P08-2010-clone1524	MW416461
			BankIt2413967 E1E2-gt1b-P08-2010-clone1525	MW416462
			BankIt2413967 E1E2-gt1b-P08-2010-clone1526	MW416463
			BankIt2413967 E1E2-gt1b-P08-2010-clone1527	MW416464
			BankIt2413967 E1E2-gt1b-P08-2010-clone1528	MW416465
			BankIt2413967 E1E2-gt1b-P08-2010-clone1813	MW416466
			BankIt2413967 E1E2-gt1b-P08-2010-clone1814	MW416467
			BankIt2413967 E1E2-gt1b-P08-2010-clone1815	MW416468
			BankIt2413967 E1E2-gt1b-P08-2010-clone1816	MW416469
			BankIt2413967 E1E2-gt1b-P08-2010-clone1821	MW416470
			BankIt2413967 E1E2-gt1b-P08-2010-clone1829	MW416471
			BankIt2413967 E1E2-gt1b-P08-2010-clone1830	MW416472
			BankIt2413992 E1E2-gt1b-P09-clone632	MW416473
			BankIt2413992 E1E2-gt1b-P09-clone633	MW416474
			BankIt2413992 E1E2-gt1b-P09-clone634	MW416475
			BankIt2413992 E1E2-gt1b-P09-clone721	MW416476
			BankIt2413992 E1E2-gt1b-P09-clone722	MW416477
			BankIt2413992 E1E2-gt1b-P09-clone732	MW416478
			BankIt2413992 E1E2-gt1b-P09-clone733	MW416479
			BankIt2413992 E1E2-gt1b-P09-clone734	MW416480
			BankIt2413992 E1E2-gt1b-P09-clone736	MW416481
			BankIt2413992 E1E2-gt1b-P09-clone737	MW416482
			BankIt2413992 E1E2-gt1b-P09-clone738	MW416483
			BankIt2413992 E1E2-gt1b-P09-clone776	MW416484
			BankIt2413992 E1E2-gt1b-P09-clone777	MW416485
			BankIt2413992 E1E2-gt1b-P09-clone778	MW416486
			BankIt2413992 E1E2-gt1b-P09-clone779	MW416487
			BankIt2413992 E1E2-gt1b-P09-clone780	MW416488
			BankIt2413992 E1E2-gt1b-P09-clone781	MW416489
			BankIt2413992 E1E2-gt1b-P09-clone782	MW416490
			BankIt2413992 E1E2-gt1b-P09-clone783	MW416491
			BankIt2413992 E1E2-gt1b-P09-clone784	MW416492
			BankIt2413992 E1E2-gt1b-P09-clone785	MW416493
			BankIt2413992 E1E2-gt1b-P09-clone787	MW416494
			BankIt2413992 E1E2-gt1b-P09-clone788	MW416495
			BankIt2413992 E1E2-gt1b-P09-clone789	MW416496
			BankIt2413992 E1E2-gt1b-P09-clone790	MW416497
			BankIt2413992 E1E2-gt1b-P09-clone791	MW416498
			BankIt2413992 E1E2-gt1b-P09-clone792	MW416499
			BankIt2413992 E1E2-gt1b-P09-clone793	MW416500
			BankIt2413992 E1E2-gt1b-P09-clone795	MW416501
			BankIt2413992 E1E2-gt1b-P09-clone796	MW416502
			BankIt2413992 E1E2-gt1b-P09-clone797	MW416503
			BankIt2413992 E1E2-gt1b-P09-clone798	MW416504
			BankIt2413992 E1E2-gt1b-P09-clone799	MW416505
			BankIt2413992 E1E2-gt1b-P09-clone800	MW416506
			BankIt2413992 E1E2-gt1b-P09-clone801	MW416507
			BankIt2413992 E1E2-gt1b-P09-clone802	MW416508
			BankIt2413992 E1E2-gt1b-P09-clone803	MW416509
			BankIt2413992 E1E2-gt1b-P09-clone804	MW416510
			BankIt2413992 E1E2-gt1b-P09-clone806	MW416511
			BankIt2413992 E1E2-gt1b-P09-clone807	MW416512
			BankIt2413992 E1E2-gt1b-P09-clone808	MW416513
			BankIt2413992 E1E2-gt1b-P09-clone809	MW416514
			BankIt2413992 E1E2-gt1b-P09-clone810	MW416515
			BankIt2413992 E1E2-gt1b-P09-clone811	MW416516
			BankIt2413992 E1E2-gt1b-P09-clone812	MW416517
			BankIt2413992 E1E2-gt1b-P09-clone813	MW416518
			BankIt2413992 E1E2-gt1b-P09-clone814	MW416519
			BankIt2413992 E1E2-gt1b-P09-clone816	MW416520
			BankIt2413992 E1E2-gt1b-P09-clone817	MW416521
			BankIt2413992 E1E2-gt1b-P09-clone818	MW416522
			BankIt2413992 E1E2-gt1b-P09-clone819	MW416523
			BankIt2413992 E1E2-gt1b-P09-clone820	MW416524
			BankIt2413992 E1E2-gt1b-P09-clone821	MW416525
			BankIt2413992 E1E2-gt1b-P09-clone870	MW416526
			BankIt2413992 E1E2-gt1b-P09-clone871	MW416527
			BankIt2413992 E1E2-gt1b-P09-clone872	MW416528
			BankIt2413992 E1E2-gt1b-P09-clone1195	MW416529
			BankIt2413992 E1E2-gt1b-P09-clone1198	MW416530
			BankIt2413992 E1E2-gt1b-P09-clone1200	MW416531
			BankIt2413992 E1E2-gt1b-P09-clone1201	MW416532
			BankIt2413992 E1E2-gt1b-P09-clone1202	MW416533
			BankIt2413992 E1E2-gt1b-P09-clone1203	MW416534
			BankIt2413992 E1E2-gt1b-P09-clone1204	MW416535
			BankIt2413992 E1E2-gt1b-P09-clone1205	MW416536
			BankIt2413992 E1E2-gt1b-P09-clone1206	MW416537
			BankIt2413992 E1E2-gt1b-P09-clone1208	MW416538
			BankIt2413992 E1E2-gt1b-P09-clone1211	MW416539
			BankIt2413992 E1E2-gt1b-P09-clone1212	MW416540
			BankIt2413992 E1E2-gt1b-P09-clone1213	MW416541
			BankIt2413992 E1E2-gt1b-P09-clone1214	MW416542
			BankIt2413992 E1E2-gt1b-P09-clone1340	MW416543
			BankIt2413992 E1E2-gt1b-P09-clone1341	MW416544
			BankIt2413992 E1E2-gt1b-P09-clone1342	MW416545
			BankIt2413992 E1E2-gt1b-P09-clone1345	MW416546
			BankIt2413992 E1E2-gt1b-P09-clone1347	MW416547
			BankIt2413992 E1E2-gt1b-P09-clone1348	MW416548
			BankIt2413992 E1E2-gt1b-P09-clone1349	MW416549
			BankIt2413992 E1E2-gt1b-P09-clone1416	MW416550
			BankIt2413992 E1E2-gt1b-P09-clone1418	MW416551
			BankIt2413992 E1E2-gt1b-P09-clone1419	MW416552
			BankIt2413992 E1E2-gt1b-P09-clone1420	MW416553
			BankIt2413992 E1E2-gt1b-P09-clone1422	MW416554
			BankIt2413992 E1E2-gt1b-P09-clone1423	MW416555
			BankIt2413992 E1E2-gt1b-P09-clone1426	MW416556
			BankIt2413992 E1E2-gt1b-P09-clone1427	MW416557
			BankIt2413992 E1E2-gt1b-P09-clone1428	MW416558
			BankIt2413992 E1E2-gt1b-P09-clone1529	MW416559
			BankIt2413992 E1E2-gt1b-P09-clone1530	MW416560
			BankIt2413992 E1E2-gt1b-P09-clone1534	MW416561
			BankIt2413992 E1E2-gt1b-P09-clone1535	MW416562
			BankIt2413992 E1E2-gt1b-P09-clone1536	MW416563
			BankIt2413992 E1E2-gt1b-P09-clone1537	MW416564
			BankIt2413992 E1E2-gt1b-P09-clone1635	MW416565
			BankIt2413992 E1E2-gt1b-P09-clone1672	MW416566
			BankIt2413992 E1E2-gt1b-P09-clone1673	MW416567
			BankIt2413992 E1E2-gt1b-P09-clone1675	MW416568
			BankIt2413992 E1E2-gt1b-P09-clone1531	MW416569
			BankIt2413992 E1E2-gt1b-P09-clone1539	MW416570
			BankIt2413992 E1E2-gt1b-P09-clone1751	MW416571
			BankIt2413992 E1E2-gt1b-P09-clone1753	MW416572
			BankIt2413992 E1E2-gt1b-P09-clone1755	MW416573
			BankIt2413992 E1E2-gt1b-P09-clone1765	MW416574
			BankIt2413992 E1E2-gt1b-P09-clone1767	MW416575
			BankIt2413992 E1E2-gt1b-P09-clone1768	MW416576
			BankIt2413992 E1E2-gt1b-P09-clone1769	MW416577
			BankIt2413992 E1E2-gt1b-P09-clone1770	MW416578
			BankIt2413992 E1E2-gt1b-P09-clone1771	MW416579
			BankIt2413992 E1E2-gt1b-P09-clone1772	MW416580
			BankIt2413992 E1E2-gt1b-P09-clone1773	MW416581
			BankIt2413992 E1E2-gt1b-P09-clone1836	MW416582
			BankIt2413992 E1E2-gt1b-P09-clone1838	MW416583
			BankIt2413992 E1E2-gt1b-P09-clone1839	MW416584
			BankIt2413992 E1E2-gt1b-P09-clone1841	MW416585
			BankIt2413992 E1E2-gt1b-P09-clone1842	MW416586
			BankIt2413992 E1E2-gt1b-P09-clone1843	MW416587
			BankIt2413992 E1E2-gt1b-P09-clone1844	MW416588
			BankIt2413992 E1E2-gt1b-P09-clone1846	MW416589
			BankIt2413992 E1E2-gt1b-P09-clone1848	MW416590
			BankIt2413992 E1E2-gt1b-P09-clone1849	MW416591
			BankIt2413992 E1E2-gt1b-P09-clone1850	MW416592
			BankIt2413992 E1E2-gt1b-P09-clone1852	MW416593
			BankIt2413992 E1E2-gt1b-P09-clone1853	MW416594
			BankIt2413992 E1E2-gt1b-P09-clone1854	MW416595
			BankIt2413992 E1E2-gt1b-P09-clone2685	MW416596
			BankIt2413992 E1E2-gt1b-P09-clone2686	MW416597
			BankIt2413992 E1E2-gt1b-P09-clone2688	MW416598
			BankIt2413992 E1E2-gt1b-P09-clone2689	MW416599
			BankIt2413992 E1E2-gt1b-P09-clone2690	MW416600
			BankIt2413992 E1E2-gt1b-P09-clone2692	MW416601
			BankIt2413992 E1E2-gt1b-P09-clone2693	MW416602
			BankIt2413992 E1E2-gt1b-P09-clone2694	MW416603
			BankIt2413992 E1E2-gt1b-P09-clone2979	MW416604
			BankIt2413992 E1E2-gt1b-P09-clone2981	MW416605
			BankIt2413992 E1E2-gt1b-P09-clone2982	MW416606
			BankIt2413992 E1E2-gt1b-P09-clone2983	MW416607
			BankIt2413992 E1E2-gt1b-P09-clone2984	MW416608
			BankIt2413992 E1E2-gt1b-P09-clone2985	MW416609
			BankIt2413992 E1E2-gt1b-P09-clone2986	MW416610
			BankIt2414026 E1E2-gt1b-P10-clone2	MW416611
			BankIt2414026 E1E2-gt1b-P10-clone3	MW416612
			BankIt2414026 E1E2-gt1b-P10-clone4	MW416613
			BankIt2414026 E1E2-gt1b-P10-clone5	MW416614
			BankIt2414026 E1E2-gt1b-P10-clone7	MW416615
			BankIt2414026 E1E2-gt1b-P10-clone8	MW416616
			BankIt2414026 E1E2-gt1b-P10-clone9	MW416617
			BankIt2414026 E1E2-gt1b-P10-clone11	MW416618
			BankIt2414026 E1E2-gt1b-P10-clone12	MW416619
			BankIt2414026 E1E2-gt1b-P10-clone13	MW416620
			BankIt2414026 E1E2-gt1b-P10-clone16	MW416621
			BankIt2414026 E1E2-gt1b-P10-clone17	MW416622
			BankIt2414026 E1E2-gt1b-P10-clone18	MW416623
			BankIt2414026 E1E2-gt1b-P10-clone19	MW416624
			BankIt2414026 E1E2-gt1b-P10-clone20	MW416625
			BankIt2414026 E1E2-gt1b-P10-clone21	MW416626
			BankIt2414026 E1E2-gt1b-P10-clone22	MW416627
			BankIt2414026 E1E2-gt1b-P10-clone23	MW416628
			BankIt2414026 E1E2-gt1b-P10-clone24	MW416629
			BankIt2414026 E1E2-gt1b-P10-clone250	MW416630
			BankIt2414026 E1E2-gt1b-P10-clone251	MW416631
			BankIt2414026 E1E2-gt1b-P10-clone252	MW416632
			BankIt2414026 E1E2-gt1b-P10-clone253	MW416633
			BankIt2414026 E1E2-gt1b-P10-clone254	MW416634
			BankIt2414026 E1E2-gt1b-P10-clone255	MW416635
			BankIt2414026 E1E2-gt1b-P10-clone256	MW416636
			BankIt2414026 E1E2-gt1b-P10-clone257	MW416637
			BankIt2414026 E1E2-gt1b-P10-clone258	MW416638
			BankIt2414026 E1E2-gt1b-P10-clone259	MW416639
			BankIt2414026 E1E2-gt1b-P10-clone260	MW416640
			BankIt2414026 E1E2-gt1b-P10-clone261	MW416641
			BankIt2414026 E1E2-gt1b-P10-clone262	MW416642
			BankIt2414026 E1E2-gt1b-P10-clone264	MW416643
			BankIt2414026 E1E2-gt1b-P10-clone265	MW416644
			BankIt2414026 E1E2-gt1b-P10-clone266	MW416645
			BankIt2414026 E1E2-gt1b-P10-clone267	MW416646
			BankIt2414026 E1E2-gt1b-P10-clone268	MW416647
			BankIt2414026 E1E2-gt1b-P10-clone269	MW416648
			BankIt2414026 E1E2-gt1b-P10-clone823	MW416649
			BankIt2414026 E1E2-gt1b-P10-clone824	MW416650
			BankIt2414026 E1E2-gt1b-P10-clone825	MW416651
			BankIt2414026 E1E2-gt1b-P10-clone826	MW416652
			BankIt2414026 E1E2-gt1b-P10-clone827	MW416653
			BankIt2414026 E1E2-gt1b-P10-clone829	MW416654
			BankIt2414026 E1E2-gt1b-P10-clone830	MW416655
			BankIt2414026 E1E2-gt1b-P10-clone831	MW416656
			BankIt2414026 E1E2-gt1b-P10-clone832	MW416657
			BankIt2414026 E1E2-gt1b-P10-clone833	MW416658
			BankIt2414026 E1E2-gt1b-P10-clone834	MW416659
			BankIt2414026 E1E2-gt1b-P10-clone835	MW416660
			BankIt2414026 E1E2-gt1b-P10-clone836	MW416661
			BankIt2414026 E1E2-gt1b-P10-clone837	MW416662
			BankIt2414026 E1E2-gt1b-P10-clone838	MW416663
			BankIt2414026 E1E2-gt1b-P10-clone839	MW416664
			BankIt2414026 E1E2-gt1b-P10-clone840	MW416665
			BankIt2414026 E1E2-gt1b-P10-clone841	MW416666
			BankIt2414026 E1E2-gt1b-P10-clone842	MW416667
			BankIt2414026 E1E2-gt1b-P10-clone843	MW416668
			BankIt2414026 E1E2-gt1b-P10-clone844	MW416669
			BankIt2414026 E1E2-gt1b-P10-clone845	MW416670
			BankIt2414026 E1E2-gt1b-P10-clone846	MW416671
			BankIt2414026 E1E2-gt1b-P10-clone847	MW416672
			BankIt2414026 E1E2-gt1b-P10-clone848	MW416673
			BankIt2414026 E1E2-gt1b-P10-clone849	MW416674
			BankIt2414026 E1E2-gt1b-P10-clone851	MW416675
			BankIt2414026 E1E2-gt1b-P10-clone1074	MW416676
			BankIt2414026 E1E2-gt1b-P10-clone1075	MW416677
			BankIt2414026 E1E2-gt1b-P10-clone1076	MW416678
			BankIt2414026 E1E2-gt1b-P10-clone1078	MW416679
			BankIt2414026 E1E2-gt1b-P10-clone1079	MW416680
			BankIt2414026 E1E2-gt1b-P10-clone1080	MW416681
			BankIt2414026 E1E2-gt1b-P10-clone1082	MW416682
			BankIt2414026 E1E2-gt1b-P10-clone1083	MW416683
			BankIt2414026 E1E2-gt1b-P10-clone1084	MW416684
			BankIt2414026 E1E2-gt1b-P10-clone1085	MW416685
			BankIt2414026 E1E2-gt1b-P10-clone1086	MW416686
			BankIt2414026 E1E2-gt1b-P10-clone1088	MW416687
			BankIt2414026 E1E2-gt1b-P10-clone1134	MW416688
			BankIt2414026 E1E2-gt1b-P10-clone1144	MW416689
			BankIt2414026 E1E2-gt1b-P10-clone1145	MW416690
			BankIt2414026 E1E2-gt1b-P10-clone1147	MW416691
			BankIt2414026 E1E2-gt1b-P10-clone1150	MW416692
			BankIt2414026 E1E2-gt1b-P10-clone1152	MW416693
			BankIt2414026 E1E2-gt1b-P10-clone1160	MW416694
			BankIt2414026 E1E2-gt1b-P10-clone1171	MW416695
			BankIt2414026 E1E2-gt1b-P10-clone1175	MW416696
			BankIt2414026 E1E2-gt1b-P10-clone1178	MW416697
			BankIt2414026 E1E2-gt1b-P10-clone1184	MW416698
			BankIt2414026 E1E2-gt1b-P10-clone1185	MW416699
			BankIt2414026 E1E2-gt1b-P10-clone1186	MW416700
			BankIt2414026 E1E2-gt1b-P10-clone1187	MW416701
			BankIt2414026 E1E2-gt1b-P10-clone1188	MW416702
			BankIt2414026 E1E2-gt1b-P10-clone1190	MW416703
			BankIt2414026 E1E2-gt1b-P10-clone1191	MW416704
			BankIt2414026 E1E2-gt1b-P10-clone1192	MW416705
			BankIt2414026 E1E2-gt1b-P10-clone1236	MW416706
			BankIt2414026 E1E2-gt1b-P10-clone1238	MW416707
			BankIt2414026 E1E2-gt1b-P10-clone1239	MW416708
			BankIt2414026 E1E2-gt1b-P10-clone1240	MW416709
			BankIt2414026 E1E2-gt1b-P10-clone1241	MW416710
			BankIt2414026 E1E2-gt1b-P10-clone1242	MW416711
			BankIt2414026 E1E2-gt1b-P10-clone1245	MW416712
			BankIt2414026 E1E2-gt1b-P10-clone1246	MW416713
			BankIt2414026 E1E2-gt1b-P10-clone1247	MW416714
			BankIt2414026 E1E2-gt1b-P10-clone1248	MW416715
			BankIt2414026 E1E2-gt1b-P10-clone1249	MW416716
			BankIt2414026 E1E2-gt1b-P10-clone1250	MW416717
			BankIt2414026 E1E2-gt1b-P10-clone1251	MW416718
			BankIt2414026 E1E2-gt1b-P10-clone1252	MW416719
			BankIt2414026 E1E2-gt1b-P10-clone1253	MW416720
			BankIt2414026 E1E2-gt1b-P10-clone1254	MW416721
			BankIt2414026 E1E2-gt1b-P10-clone2878	MW416722
			BankIt2414026 E1E2-gt1b-P10-clone2880	MW416723
			BankIt2414026 E1E2-gt1b-P10-clone2881	MW416724
			BankIt2414026 E1E2-gt1b-P10-clone2883	MW416725
			BankIt2414026 E1E2-gt1b-P10-clone2990	MW416726
			BankIt2414026 E1E2-gt1b-P10-clone2998	MW416727
			BankIt2414026 E1E2-gt1b-P10-clone3000	MW416728
			BankIt2414035 E1E2-gt1b-P11-clone270	MW416729
			BankIt2414035 E1E2-gt1b-P11-clone275	MW416730
			BankIt2414035 E1E2-gt1b-P11-clone277	MW416731
			BankIt2414035 E1E2-gt1b-P11-clone282	MW416732
			BankIt2414035 E1E2-gt1b-P11-clone283	MW416733
			BankIt2414035 E1E2-gt1b-P11-clone284	MW416734
			BankIt2414035 E1E2-gt1b-P11-clone359	MW416735
			BankIt2414035 E1E2-gt1b-P11-clone360	MW416736
			BankIt2414035 E1E2-gt1b-P11-clone361	MW416737
			BankIt2414035 E1E2-gt1b-P11-clone364	MW416738
			BankIt2414035 E1E2-gt1b-P11-clone366	MW416739
			BankIt2414035 E1E2-gt1b-P11-clone368	MW416740
			BankIt2414035 E1E2-gt1b-P11-clone370	MW416741
			BankIt2414035 E1E2-gt1b-P11-clone371	MW416742
			BankIt2414035 E1E2-gt1b-P11-clone375	MW416743
			BankIt2414035 E1E2-gt1b-P11-clone400	MW416744
			BankIt2414035 E1E2-gt1b-P11-clone401	MW416745
			BankIt2414035 E1E2-gt1b-P11-clone402	MW416746
			BankIt2414035 E1E2-gt1b-P11-clone403	MW416747
			BankIt2414035 E1E2-gt1b-P11-clone404	MW416748
			BankIt2414035 E1E2-gt1b-P11-clone405	MW416749
			BankIt2414035 E1E2-gt1b-P11-clone407	MW416750
			BankIt2414035 E1E2-gt1b-P11-clone408	MW416751
			BankIt2414035 E1E2-gt1b-P11-clone409	MW416752
			BankIt2414035 E1E2-gt1b-P11-clone410	MW416753
			BankIt2414035 E1E2-gt1b-P11-clone412	MW416754
			BankIt2414035 E1E2-gt1b-P11-clone413	MW416755
			BankIt2414038 E1E2-gt1b-P12-clone506	MW416756
			BankIt2414038 E1E2-gt1b-P12-clone508	MW416757
			BankIt2414038 E1E2-gt1b-P12-clone510	MW416758
			BankIt2414038 E1E2-gt1b-P12-clone511	MW416759
			BankIt2414038 E1E2-gt1b-P12-clone512	MW416760
			BankIt2414038 E1E2-gt1b-P12-clone513	MW416761
			BankIt2414038 E1E2-gt1b-P12-clone514	MW416762
			BankIt2414038 E1E2-gt1b-P12-clone515	MW416763
			BankIt2414038 E1E2-gt1b-P12-clone516	MW416764
			BankIt2414038 E1E2-gt1b-P12-clone517	MW416765
			BankIt2414038 E1E2-gt1b-P12-clone518	MW416766
			BankIt2414038 E1E2-gt1b-P12-clone519	MW416767
			BankIt2414038 E1E2-gt1b-P12-clone520	MW416768
			BankIt2414038 E1E2-gt1b-P12-clone521	MW416769
			BankIt2414038 E1E2-gt1b-P12-clone524	MW416770
			BankIt2414038 E1E2-gt1b-P12-clone525	MW416771
			BankIt2414038 E1E2-gt1b-P12-clone527	MW416772
			BankIt2414038 E1E2-gt1b-P12-clone528	MW416773
			BankIt2414038 E1E2-gt1b-P12-clone530	MW416774
			BankIt2414038 E1E2-gt1b-P12-clone531	MW416775
			BankIt2414038 E1E2-gt1b-P12-clone532	MW416776
			BankIt2414038 E1E2-gt1b-P12-clone533	MW416777
			BankIt2414038 E1E2-gt1b-P12-clone534	MW416778
			BankIt2414038 E1E2-gt1b-P12-clone535	MW416779
			BankIt2414038 E1E2-gt1b-P12-clone536	MW416780
			BankIt2414038 E1E2-gt1b-P12-clone537	MW416781
			BankIt2414038 E1E2-gt1b-P12-clone538	MW416782
			BankIt2414038 E1E2-gt1b-P12-clone540	MW416783
			BankIt2414038 E1E2-gt1b-P12-clone544	MW416784
			BankIt2414038 E1E2-gt1b-P12-clone545	MW416785
			BankIt2414038 E1E2-gt1b-P12-clone581	MW416786
			BankIt2414038 E1E2-gt1b-P12-clone582	MW416787
			BankIt2414038 E1E2-gt1b-P12-clone583	MW416788
			BankIt2414038 E1E2-gt1b-P12-clone584	MW416789
			BankIt2414038 E1E2-gt1b-P12-clone586	MW416790
			BankIt2414038 E1E2-gt1b-P12-clone675	MW416791
			BankIt2414038 E1E2-gt1b-P12-clone677	MW416792
			BankIt2414038 E1E2-gt1b-P12-clone678	MW416793
			BankIt2414038 E1E2-gt1b-P12-clone679	MW416794
			BankIt2414038 E1E2-gt1b-P12-clone680	MW416795
			BankIt2414038 E1E2-gt1b-P12-clone681	MW416796
			BankIt2414038 E1E2-gt1b-P12-clone682	MW416797
			BankIt2414038 E1E2-gt1b-P12-clone683	MW416798
			BankIt2414038 E1E2-gt1b-P12-clone684	MW416799
			BankIt2414038 E1E2-gt1b-P12-clone685	MW416800
			BankIt2414038 E1E2-gt1b-P12-clone762	MW416801
			BankIt2414038 E1E2-gt1b-P12-clone763	MW416802
			BankIt2414038 E1E2-gt1b-P12-clone764	MW416803
			BankIt2414038 E1E2-gt1b-P12-clone765	MW416804
			BankIt2414038 E1E2-gt1b-P12-clone766	MW416805
			BankIt2414038 E1E2-gt1b-P12-clone770	MW416806
			BankIt2414038 E1E2-gt1b-P12-clone771	MW416807
			BankIt2414038 E1E2-gt1b-P12-clone774	MW416808
			BankIt2414038 E1E2-gt1b-P12-clone1056	MW416809
			BankIt2414038 E1E2-gt1b-P12-clone1057	MW416810
			BankIt2414038 E1E2-gt1b-P12-clone1058	MW416811
			BankIt2414038 E1E2-gt1b-P12-clone1060	MW416812
			BankIt2414038 E1E2-gt1b-P12-clone1061	MW416813
			BankIt2414038 E1E2-gt1b-P12-clone1063	MW416814
			BankIt2414038 E1E2-gt1b-P12-clone1064	MW416815
			BankIt2414038 E1E2-gt1b-P12-clone1065	MW416816
			BankIt2414038 E1E2-gt1b-P12-clone1066	MW416817
			BankIt2414038 E1E2-gt1b-P12-clone1068	MW416818
			BankIt2414038 E1E2-gt1b-P12-clone1069	MW416819
			BankIt2414038 E1E2-gt1b-P12-clone1070	MW416820
			BankIt2414038 E1E2-gt1b-P12-clone1071	MW416821
			BankIt2414038 E1E2-gt1b-P12-clone1072	MW416822
			BankIt2414038 E1E2-gt1b-P12-clone1090	MW416823
			BankIt2414038 E1E2-gt1b-P12-clone1095	MW416824
			BankIt2414038 E1E2-gt1b-P12-clone1099	MW416825
			BankIt2414038 E1E2-gt1b-P12-clone1220	MW416826
			BankIt2414038 E1E2-gt1b-P12-clone1221	MW416827
			BankIt2414038 E1E2-gt1b-P12-clone1222	MW416828
			BankIt2414038 E1E2-gt1b-P12-clone1230	MW416829
			BankIt2414038 E1E2-gt1b-P12-clone1225	MW416830
			BankIt2414038 E1E2-gt1b-P12-clone1227	MW416831
			BankIt2414038 E1E2-gt1b-P12-clone1228	MW416832
			BankIt2414038 E1E2-gt1b-P12-clone1229	MW416833
			BankIt2414038 E1E2-gt1b-P12-clone1233	MW416834
			BankIt2414038 E1E2-gt1b-P12-clone1261	MW416835
			BankIt2414038 E1E2-gt1b-P12-clone1262	MW416836
			BankIt2414038 E1E2-gt1b-P12-clone1264	MW416837
			BankIt2414038 E1E2-gt1b-P12-clone1266	MW416838
			BankIt2414038 E1E2-gt1b-P12-clone1267	MW416839
			BankIt2414038 E1E2-gt1b-P12-clone1268	MW416840
			BankIt2414038 E1E2-gt1b-P12-clone1272	MW416841
			BankIt2414038 E1E2-gt1b-P12-clone1275	MW416842
			BankIt2414038 E1E2-gt1b-P12-clone1278	MW416843
			BankIt2414038 E1E2-gt1b-P12-clone1279	MW416844
			BankIt2414038 E1E2-gt1b-P12-clone1280	MW416845
			BankIt2414038 E1E2-gt1b-P12-clone1282	MW416846
			BankIt2414038 E1E2-gt1b-P12-clone1285	MW416847
			BankIt2414038 E1E2-gt1b-P12-clone1286	MW416848
			BankIt2414038 E1E2-gt1b-P12-clone1288	MW416849
			BankIt2414038 E1E2-gt1b-P12-clone1290	MW416850
			BankIt2414038 E1E2-gt1b-P12-clone1292	MW416851
			BankIt2414038 E1E2-gt1b-P12-clone1294	MW416852
			BankIt2414038 E1E2-gt1b-P12-clone1295	MW416853
			BankIt2414038 E1E2-gt1b-P12-clone1296	MW416854
			BankIt2414038 E1E2-gt1b-P12-clone1297	MW416855
			BankIt2414038 E1E2-gt1b-P12-clone1298	MW416856
			BankIt2414038 E1E2-gt1b-P12-clone1299	MW416857
			BankIt2414038 E1E2-gt1b-P12-clone1300	MW416858
			BankIt2414038 E1E2-gt1b-P12-clone1301	MW416859
			BankIt2414038 E1E2-gt1b-P12-clone1302	MW416860
			BankIt2414038 E1E2-gt1b-P12-clone1303	MW416861
			BankIt2414038 E1E2-gt1b-P12-clone1304	MW416862
			BankIt2414038 E1E2-gt1b-P12-clone1305	MW416863
			BankIt2414038 E1E2-gt1b-P12-clone1306	MW416864
			BankIt2414038 E1E2-gt1b-P12-clone1307	MW416865
			BankIt2414038 E1E2-gt1b-P12-clone1308	MW416866
			BankIt2414038 E1E2-gt1b-P12-clone1309	MW416867
			BankIt2414038 E1E2-gt1b-P12-clone1311	MW416868
			BankIt2414038 E1E2-gt1b-P12-clone1312	MW416869
			BankIt2414038 E1E2-gt1b-P12-clone1313	MW416870
			BankIt2414038 E1E2-gt1b-P12-clone1350	MW416871
			BankIt2414038 E1E2-gt1b-P12-clone1351	MW416872
			BankIt2414038 E1E2-gt1b-P12-clone1352	MW416873
			BankIt2414038 E1E2-gt1b-P12-clone1353	MW416874
			BankIt2414038 E1E2-gt1b-P12-clone1354	MW416875
			BankIt2414038 E1E2-gt1b-P12-clone1356	MW416876
			BankIt2414038 E1E2-gt1b-P12-clone1379	MW416877
			BankIt2414038 E1E2-gt1b-P12-clone1450	MW416878
			BankIt2414038 E1E2-gt1b-P12-clone1460	MW416879
			BankIt2414038 E1E2-gt1b-P12-clone1461	MW416880
			BankIt2414038 E1E2-gt1b-P12-clone1465	MW416881
			BankIt2414038 E1E2-gt1b-P12-clone1467	MW416882
			BankIt2414038 E1E2-gt1b-P12-clone1468	MW416883
			BankIt2414038 E1E2-gt1b-P12-clone1472	MW416884
			BankIt2414038 E1E2-gt1b-P12-clone1474	MW416885
			BankIt2414038 E1E2-gt1b-P12-clone1475	MW416886
			BankIt2414038 E1E2-gt1b-P12-clone1477	MW416887
			BankIt2414038 E1E2-gt1b-P12-clone1478	MW416888
			BankIt2414038 E1E2-gt1b-P12-clone1479	MW416889
			BankIt2414038 E1E2-gt1b-P12-clone1481	MW416890
			BankIt2414038 E1E2-gt1b-P12-clone1483	MW416891
			BankIt2414038 E1E2-gt1b-P12-clone1484	MW416892
			BankIt2414038 E1E2-gt1b-P12-clone1487	MW416893
			BankIt2414038 E1E2-gt1b-P12-clone1488	MW416894
			BankIt2414038 E1E2-gt1b-P12-clone1490	MW416895
			BankIt2414038 E1E2-gt1b-P12-clone1491	MW416896
			BankIt2414038 E1E2-gt1b-P12-clone1492	MW416897
			BankIt2414038 E1E2-gt1b-P12-clone1493	MW416898
			BankIt2414038 E1E2-gt1b-P12-clone1494	MW416899
			BankIt2414038 E1E2-gt1b-P12-clone1496	MW416900
			BankIt2414038 E1E2-gt1b-P12-clone1497	MW416901
			BankIt2414038 E1E2-gt1b-P12-clone1498	MW416902
			BankIt2414038 E1E2-gt1b-P12-clone1591	MW416903
			BankIt2414038 E1E2-gt1b-P12-clone1593	MW416904
			BankIt2414038 E1E2-gt1b-P12-clone1594	MW416905
			BankIt2414038 E1E2-gt1b-P12-clone1595	MW416906
			BankIt2414038 E1E2-gt1b-P12-clone1596	MW416907
			BankIt2414038 E1E2-gt1b-P12-clone1598	MW416908
			BankIt2414038 E1E2-gt1b-P12-clone1903	MW416909
			BankIt2414038 E1E2-gt1b-P12-clone1905	MW416910
			BankIt2414038 E1E2-gt1b-P12-clone2269	MW416911
			BankIt2414038 E1E2-gt1b-P12-clone2272	MW416912
			BankIt2414038 E1E2-gt1b-P12-clone2273	MW416913
			BankIt2414038 E1E2-gt1b-P12-clone2274	MW416914
			BankIt2414038 E1E2-gt1b-P12-clone2275	MW416915
			BankIt2414038 E1E2-gt1b-P12-clone2276	MW416916
			BankIt2414038 E1E2-gt1b-P12-clone2278	MW416917
			BankIt2414038 E1E2-gt1b-P12-clone2279	MW416918
			BankIt2414038 E1E2-gt1b-P12-clone2281	MW416919
			BankIt2414038 E1E2-gt1b-P12-clone2282	MW416920
			BankIt2414038 E1E2-gt1b-P12-clone2283	MW416921
			BankIt2414038 E1E2-gt1b-P12-clone2284	MW416922
			BankIt2414038 E1E2-gt1b-P12-clone2285	MW416923
			BankIt2414038 E1E2-gt1b-P12-clone2286	MW416924
			BankIt2414038 E1E2-gt1b-P12-clone2288	MW416925
			BankIt2414038 E1E2-gt1b-P12-clone2290	MW416926
			BankIt2414038 E1E2-gt1b-P12-clone2293	MW416927
			BankIt2414038 E1E2-gt1b-P12-clone2699	MW416928
			BankIt2414038 E1E2-gt1b-P12-clone2700	MW416929
			BankIt2414038 E1E2-gt1b-P12-clone2701	MW416930
			BankIt2414038 E1E2-gt1b-P12-clone2702	MW416931
			BankIt2414038 E1E2-gt1b-P12-clone2703	MW416932
			BankIt2414038 E1E2-gt1b-P12-clone2704	MW416933
			BankIt2414038 E1E2-gt1b-P12-clone2706	MW416934
			BankIt2414038 E1E2-gt1b-P12-clone2707	MW416935
			BankIt2414038 E1E2-gt1b-P12-clone3077	MW416936
			BankIt2414038 E1E2-gt1b-P12-clone3078	MW416937
			BankIt2414038 E1E2-gt1b-P12-clone3079	MW416938
			BankIt2414038 E1E2-gt1b-P12-clone3080	MW416939
			BankIt2414038 E1E2-gt1b-P12-clone3081	MW416940
			BankIt2414038 E1E2-gt1b-P12-clone3082	MW416941
			BankIt2414038 E1E2-gt1b-P12-clone3083	MW416942
			BankIt2414038 E1E2-gt1b-P12-clone3084	MW416943
			BankIt2414038 E1E2-gt1b-P12-clone3085	MW416944
			BankIt2414038 E1E2-gt1b-P12-clone3086	MW416945
			BankIt2414038 E1E2-gt1b-P12-clone3087	MW416946
			BankIt2414038 E1E2-gt1b-P12-clone3088	MW416947
			BankIt2414038 E1E2-gt1b-P12-clone3089	MW416948
			BankIt2414038 E1E2-gt1b-P12-clone3090	MW416949
			BankIt2414038 E1E2-gt1b-P12-clone3091	MW416950
			BankIt2414038 E1E2-gt1b-P12-clone3092	MW416951
			BankIt2414038 E1E2-gt1b-P12-clone3094	MW416952
			BankIt2414038 E1E2-gt1b-P12-clone3095	MW416953
			BankIt2414038 E1E2-gt1b-P12-clone3097	MW416954
			BankIt2414056 E1E2-gt3a-P13-clone321	MW416955
			BankIt2414056 E1E2-gt3a-P13-clone322	MW416956
			BankIt2414056 E1E2-gt3a-P13-clone323	MW416957
			BankIt2414056 E1E2-gt3a-P13-clone324	MW416958
			BankIt2414056 E1E2-gt3a-P13-clone325	MW416959
			BankIt2414056 E1E2-gt3a-P13-clone326	MW416960
			BankIt2414056 E1E2-gt3a-P13-clone327	MW416961
			BankIt2414056 E1E2-gt3a-P13-clone328	MW416962
			BankIt2414056 E1E2-gt3a-P13-clone330	MW416963
			BankIt2414056 E1E2-gt3a-P13-clone331	MW416964
			BankIt2414056 E1E2-gt3a-P13-clone332	MW416965
			BankIt2414056 E1E2-gt3a-P13-clone334	MW416966
			BankIt2414056 E1E2-gt3a-P13-clone335	MW416967
			BankIt2414056 E1E2-gt3a-P13-clone336	MW416968
			BankIt2414056 E1E2-gt3a-P13-clone337	MW416969
			BankIt2414056 E1E2-gt3a-P13-clone339	MW416970
			BankIt2414056 E1E2-gt3a-P13-clone340	MW416971
			BankIt2414056 E1E2-gt3a-P13-clone342	MW416972
			BankIt2414056 E1E2-gt3a-P13-clone568	MW416973
			BankIt2414060 E1E2-gt3a-P14-clone1856	MW416974
			BankIt2414060 E1E2-gt3a-P14-clone1857	MW416975
			BankIt2414060 E1E2-gt3a-P14-clone1860	MW416976
			BankIt2414060 E1E2-gt3a-P14-clone1861	MW416977
			BankIt2414060 E1E2-gt3a-P14-clone1862	MW416978
			BankIt2414060 E1E2-gt3a-P14-clone1863	MW416979
			BankIt2414060 E1E2-gt3a-P14-clone1864	MW416980
			BankIt2414060 E1E2-gt3a-P14-clone1865	MW416981
			BankIt2414060 E1E2-gt3a-P14-clone1866	MW416982
			BankIt2414060 E1E2-gt3a-P14-clone1867	MW416983
			BankIt2414060 E1E2-gt3a-P14-clone1868	MW416984
			BankIt2414060 E1E2-gt3a-P14-clone1869	MW416985
			BankIt2414060 E1E2-gt3a-P14-clone1870	MW416986
			BankIt2414060 E1E2-gt3a-P14-clone1871	MW416987
			BankIt2414060 E1E2-gt3a-P14-clone1872	MW416988
			BankIt2414060 E1E2-gt3a-P14-clone2017	MW416989
			BankIt2414060 E1E2-gt3a-P14-clone2018	MW416990
			BankIt2414060 E1E2-gt3a-P14-clone2019	MW416991
			BankIt2414060 E1E2-gt3a-P14-clone2020	MW416992
			BankIt2414060 E1E2-gt3a-P14-clone2021	MW416993
			BankIt2414060 E1E2-gt3a-P14-clone2022	MW416994
			BankIt2414060 E1E2-gt3a-P14-clone2023	MW416995
			BankIt2414060 E1E2-gt3a-P14-clone2024	MW416996
			BankIt2414060 E1E2-gt3a-P14-clone2025	MW416997
			BankIt2414060 E1E2-gt3a-P14-clone2026	MW416998
			BankIt2414060 E1E2-gt3a-P14-clone2028	MW416999
			BankIt2414060 E1E2-gt3a-P14-clone2030	MW417000
			BankIt2414060 E1E2-gt3a-P14-clone2031	MW417001
			BankIt2414060 E1E2-gt3a-P14-clone2032	MW417002
			BankIt2414060 E1E2-gt3a-P14-clone2033	MW417003
			BankIt2414060 E1E2-gt3a-P14-clone2034	MW417004
			BankIt2414060 E1E2-gt3a-P14-clone2035	MW417005
			BankIt2414060 E1E2-gt3a-P14-clone2036	MW417006
			BankIt2414060 E1E2-gt3a-P14-clone2038	MW417007
			BankIt2414060 E1E2-gt3a-P14-clone2039	MW417008
			BankIt2414060 E1E2-gt3a-P14-clone2040	MW417009
			BankIt2414060 E1E2-gt3a-P14-clone2041	MW417010
			BankIt2414060 E1E2-gt3a-P14-clone2212	MW417011
			BankIt2414060 E1E2-gt3a-P14-clone2213	MW417012
			BankIt2414060 E1E2-gt3a-P14-clone2214	MW417013
			BankIt2414060 E1E2-gt3a-P14-clone2216	MW417014
			BankIt2414060 E1E2-gt3a-P14-clone2217	MW417015
			BankIt2414060 E1E2-gt3a-P14-clone2218	MW417016
			BankIt2414060 E1E2-gt3a-P14-clone2219	MW417017
			BankIt2414060 E1E2-gt3a-P14-clone2220	MW417018
			BankIt2414060 E1E2-gt3a-P14-clone2221	MW417019
			BankIt2414060 E1E2-gt3a-P14-clone2222	MW417020
			BankIt2414060 E1E2-gt3a-P14-clone2223	MW417021
			BankIt2414060 E1E2-gt3a-P14-clone2224	MW417022
			BankIt2414060 E1E2-gt3a-P14-clone2225	MW417023
			BankIt2414060 E1E2-gt3a-P14-clone2226	MW417024
			BankIt2414060 E1E2-gt3a-P14-clone2227	MW417025
			BankIt2414060 E1E2-gt3a-P14-clone2228	MW417026
			BankIt2414065 E1E2-gt3a-P15-clone92	MW417027
			BankIt2414065 E1E2-gt3a-P15-clone94	MW417028
			BankIt2414065 E1E2-gt3a-P15-clone95	MW417029
			BankIt2414065 E1E2-gt3a-P15-clone96	MW417030
			BankIt2414065 E1E2-gt3a-P15-clone97	MW417031
			BankIt2414065 E1E2-gt3a-P15-clone98	MW417032
			BankIt2414065 E1E2-gt3a-P15-clone99	MW417033
			BankIt2414065 E1E2-gt3a-P15-clone100	MW417034
			BankIt2414065 E1E2-gt3a-P15-clone102	MW417035
			BankIt2414065 E1E2-gt3a-P15-clone103	MW417036
			BankIt2414065 E1E2-gt3a-P15-clone104	MW417037
			BankIt2414065 E1E2-gt3a-P15-clone105	MW417038
			BankIt2414065 E1E2-gt3a-P15-clone106	MW417039
			BankIt2414065 E1E2-gt3a-P15-clone107	MW417040
			BankIt2414065 E1E2-gt3a-P15-clone108	MW417041
			BankIt2414065 E1E2-gt3a-P15-clone109	MW417042
			BankIt2414065 E1E2-gt3a-P15-clone111	MW417043
			BankIt2414065 E1E2-gt3a-P15-clone112	MW417044
			BankIt2414065 E1E2-gt3a-P15-clone377	MW417045
			BankIt2414065 E1E2-gt3a-P15-clone378	MW417046
			BankIt2414065 E1E2-gt3a-P15-clone380	MW417047
			BankIt2414065 E1E2-gt3a-P15-clone381	MW417048
			BankIt2414065 E1E2-gt3a-P15-clone382	MW417049
			BankIt2414065 E1E2-gt3a-P15-clone383	MW417050
			BankIt2414065 E1E2-gt3a-P15-clone384	MW417051
			BankIt2414065 E1E2-gt3a-P15-clone385	MW417052
			BankIt2414065 E1E2-gt3a-P15-clone386	MW417053
			BankIt2414065 E1E2-gt3a-P15-clone387	MW417054
			BankIt2414065 E1E2-gt3a-P15-clone388	MW417055
			BankIt2414065 E1E2-gt3a-P15-clone389	MW417056
			BankIt2414065 E1E2-gt3a-P15-clone390	MW417057
			BankIt2414065 E1E2-gt3a-P15-clone391	MW417058
			BankIt2414065 E1E2-gt3a-P15-clone392	MW417059
			BankIt2414065 E1E2-gt3a-P15-clone393	MW417060
			BankIt2414065 E1E2-gt3a-P15-clone394	MW417061
			BankIt2414065 E1E2-gt3a-P15-clone395	MW417062
			BankIt2414065 E1E2-gt3a-P15-clone445	MW417063
			BankIt2414065 E1E2-gt3a-P15-clone446	MW417064
			BankIt2414065 E1E2-gt3a-P15-clone448	MW417065
			BankIt2414065 E1E2-gt3a-P15-clone449	MW417066
			BankIt2414065 E1E2-gt3a-P15-clone450	MW417067
			BankIt2414065 E1E2-gt3a-P15-clone451	MW417068
			BankIt2414065 E1E2-gt3a-P15-clone452	MW417069
			BankIt2414065 E1E2-gt3a-P15-clone453	MW417070
			BankIt2414065 E1E2-gt3a-P15-clone741	MW417071
			BankIt2414065 E1E2-gt3a-P15-clone747	MW417072
			BankIt2414065 E1E2-gt3a-P15-clone750	MW417073
			BankIt2414065 E1E2-gt3a-P15-clone754	MW417074
			BankIt2414065 E1E2-gt3a-P15-clone755	MW417075
			BankIt2414065 E1E2-gt3a-P15-clone758	MW417076
			BankIt2414065 E1E2-gt3a-P15-clone760	MW417077
			BankIt2414065 E1E2-gt3a-P15-clone761	MW417078
			BankIt2414065 E1E2-gt3a-P15-clone853	MW417079
			BankIt2414065 E1E2-gt3a-P15-clone854	MW417080
			BankIt2414065 E1E2-gt3a-P15-clone855	MW417081
			BankIt2414065 E1E2-gt3a-P15-clone856	MW417082
			BankIt2414065 E1E2-gt3a-P15-clone865	MW417083
			BankIt2414065 E1E2-gt3a-P15-clone868	MW417084
			BankIt2414065 E1E2-gt3a-P15-clone3177	MW417085
			BankIt2414065 E1E2-gt3a-P15-clone3182	MW417086
			BankIt2414065 E1E2-gt3a-P15-clone3183	MW417087
			BankIt2414065 E1E2-gt3a-P15-clone3185	MW417088
			BankIt2414065 E1E2-gt3a-P15-clone3189	MW417089
			BankIt2414065 E1E2-gt3a-P15-clone3190	MW417090
			BankIt2414065 E1E2-gt3a-P15-clone3195	MW417091
			BankIt2414065 E1E2-gt3a-P15-clone3198	MW417092
			BankIt2414065 E1E2-gt3a-P15-clone3204	MW417093
			BankIt2414065 E1E2-gt3a-P15-clone3206	MW417094
			BankIt2414065 E1E2-gt3a-P15-clone3208	MW417095
			BankIt2414065 E1E2-gt3a-P15-clone3212	MW417096
			BankIt2414404 E1E2-gt1a-P15-clone176	MW424024
			BankIt2414404 E1E2-gt1a-P15-clone179	MW424025
			BankIt2414404 E1E2-gt1a-P15-clone180	MW424026
			BankIt2414404 E1E2-gt1a-P15-clone182	MW424027
			BankIt2414404 E1E2-gt1a-P15-clone184	MW424028
			BankIt2414404 E1E2-gt1a-P15-clone185	MW424029
			BankIt2414404 E1E2-gt1a-P15-clone186	MW424030
			BankIt2414404 E1E2-gt1a-P15-clone187	MW424031
			BankIt2414404 E1E2-gt1a-P15-clone188	MW424032
			BankIt2414404 E1E2-gt1a-P15-clone213	MW424033
			BankIt2414404 E1E2-gt1a-P15-clone214	MW424034
			BankIt2414404 E1E2-gt1a-P15-clone215	MW424035
			BankIt2414404 E1E2-gt1a-P15-clone216	MW424036
			BankIt2414404 E1E2-gt1a-P15-clone217	MW424037
			BankIt2414404 E1E2-gt1a-P15-clone218	MW424038
			BankIt2414404 E1E2-gt1a-P15-clone219	MW424039
			BankIt2414404 E1E2-gt1a-P15-clone220	MW424040
			BankIt2414404 E1E2-gt1a-P15-clone221	MW424041
			BankIt2414404 E1E2-gt1a-P15-clone222	MW424042
			BankIt2414404 E1E2-gt1a-P15-clone223	MW424043
			BankIt2414404 E1E2-gt1a-P15-clone224	MW424044
			BankIt2414404 E1E2-gt1a-P15-clone225	MW424045
			BankIt2414404 E1E2-gt1a-P15-clone228	MW424046
			BankIt2414404 E1E2-gt1a-P15-clone484	MW424047
			BankIt2414404 E1E2-gt1a-P15-clone488	MW424048
			BankIt2414404 E1E2-gt1a-P15-clone489	MW424049
			BankIt2414404 E1E2-gt1a-P15-clone490	MW424050
			BankIt2414404 E1E2-gt1a-P15-clone491	MW424051
			BankIt2414404 E1E2-gt1a-P15-clone493	MW424052
			BankIt2414404 E1E2-gt1a-P15-clone494	MW424053
			BankIt2414404 E1E2-gt1a-P15-clone876	MW424054
			BankIt2414404 E1E2-gt1a-P15-clone880	MW424055
			BankIt2414404 E1E2-gt1a-P15-clone885	MW424056
			BankIt2414404 E1E2-gt1a-P15-clone889	MW424057
			BankIt2414404 E1E2-gt1a-P15-clone891	MW424058
			BankIt2414404 E1E2-gt1a-P15-clone895	MW424059
			BankIt2414404 E1E2-gt1a-P15-clone896	MW424060
			BankIt2414404 E1E2-gt1a-P15-clone1045	MW424061
			BankIt2414404 E1E2-gt1a-P15-clone1053	MW424062
			BankIt2414418 E1E2-gt3a-P16-clone2074	MW424063
			BankIt2414418 E1E2-gt3a-P16-clone2075	MW424064
			BankIt2414418 E1E2-gt3a-P16-clone2076	MW424065
			BankIt2414418 E1E2-gt3a-P16-clone2077	MW424066
			BankIt2414418 E1E2-gt3a-P16-clone2078	MW424067
			BankIt2414418 E1E2-gt3a-P16-clone2079	MW424068
			BankIt2414418 E1E2-gt3a-P16-clone2080	MW424069
			BankIt2414418 E1E2-gt3a-P16-clone2081	MW424070
			BankIt2414418 E1E2-gt3a-P16-clone2083	MW424071
			BankIt2414418 E1E2-gt3a-P16-clone2084	MW424072
			BankIt2414418 E1E2-gt3a-P16-clone2085	MW424073
			BankIt2414418 E1E2-gt3a-P16-clone2086	MW424074
			BankIt2414418 E1E2-gt3a-P16-clone2087	MW424075
			BankIt2414418 E1E2-gt3a-P16-clone2088	MW424076
			BankIt2414418 E1E2-gt3a-P16-clone2089	MW424077
			BankIt2414418 E1E2-gt3a-P16-clone2090	MW424078
			BankIt2414418 E1E2-gt3a-P16-clone2091	MW424079
			BankIt2414418 E1E2-gt3a-P16-clone2092	MW424080
			BankIt2414418 E1E2-gt3a-P16-clone2093	MW424081
			BankIt2414418 E1E2-gt3a-P16-clone2094	MW424082
			BankIt2414418 E1E2-gt3a-P16-clone2095	MW424083
			BankIt2414418 E1E2-gt3a-P16-clone2096	MW424084
			BankIt2414418 E1E2-gt3a-P16-clone2098	MW424085
			BankIt2414418 E1E2-gt3a-P16-clone2099	MW424086
			BankIt2414418 E1E2-gt3a-P16-clone2100	MW424087
			BankIt2414418 E1E2-gt3a-P16-clone2101	MW424088
			BankIt2414418 E1E2-gt3a-P16-clone2102	MW424089
			BankIt2414418 E1E2-gt3a-P16-clone2207	MW424090
			BankIt2414418 E1E2-gt3a-P16-clone2208	MW424091
			BankIt2414418 E1E2-gt3a-P16-clone2210	MW424092
			BankIt2414418 E1E2-gt3a-P16-clone2211	MW424093
			BankIt2414418 E1E2-gt3a-P16-clone2294	MW424094
			BankIt2414418 E1E2-gt3a-P16-clone2295	MW424095
			BankIt2414418 E1E2-gt3a-P16-clone2296	MW424096
			BankIt2414418 E1E2-gt3a-P16-clone2297	MW424097
			BankIt2414418 E1E2-gt3a-P16-clone2298	MW424098
			BankIt2414418 E1E2-gt3a-P16-clone2299	MW424099
			BankIt2414418 E1E2-gt3a-P16-clone2300	MW424100
			BankIt2414418 E1E2-gt3a-P16-clone2301	MW424101
			BankIt2414418 E1E2-gt3a-P16-clone2303	MW424102
			BankIt2414418 E1E2-gt3a-P16-clone2304	MW424103
			BankIt2414418 E1E2-gt3a-P16-clone2305	MW424104
			BankIt2414418 E1E2-gt3a-P16-clone2306	MW424105
			BankIt2414418 E1E2-gt3a-P16-clone2307	MW424106
			BankIt2414418 E1E2-gt3a-P16-clone2308	MW424107
			BankIt2414418 E1E2-gt3a-P16-clone2309	MW424108
			BankIt2414418 E1E2-gt3a-P16-clone2310	MW424109
			BankIt2414418 E1E2-gt3a-P16-clone2311	MW424110
			BankIt2414418 E1E2-gt3a-P16-clone2312	MW424111
			BankIt2414418 E1E2-gt3a-P16-clone2313	MW424112
			BankIt2414418 E1E2-gt3a-P16-clone2314	MW424113
			BankIt2414418 E1E2-gt3a-P16-clone2315	MW424114
			BankIt2414418 E1E2-gt3a-P16-clone2316	MW424115
			BankIt2414418 E1E2-gt3a-P16-clone2318	MW424116
			BankIt2414418 E1E2-gt3a-P16-clone2319	MW424117
			BankIt2414418 E1E2-gt3a-P16-clone2320	MW424118
			BankIt2414418 E1E2-gt3a-P16-clone2321	MW424119
			BankIt2414418 E1E2-gt3a-P16-clone2322	MW424120
			BankIt2414418 E1E2-gt3a-P16-clone2357	MW424121
			BankIt2414418 E1E2-gt3a-P16-clone2358	MW424122
			BankIt2414418 E1E2-gt3a-P16-clone2360	MW424123
			BankIt2414418 E1E2-gt3a-P16-clone2361	MW424124
			BankIt2414418 E1E2-gt3a-P16-clone2362	MW424125
			BankIt2414418 E1E2-gt3a-P16-clone2363	MW424126
			BankIt2414418 E1E2-gt3a-P16-clone2364	MW424127
			BankIt2414418 E1E2-gt3a-P16-clone2365	MW424128
			BankIt2414418 E1E2-gt3a-P16-clone2366	MW424129
			BankIt2414418 E1E2-gt3a-P16-clone2367	MW424130
			BankIt2414418 E1E2-gt3a-P16-clone2368	MW424131
			BankIt2414418 E1E2-gt3a-P16-clone2369	MW424132
			BankIt2414418 E1E2-gt3a-P16-clone2370	MW424133
			BankIt2414418 E1E2-gt3a-P16-clone2371	MW424134
			BankIt2414418 E1E2-gt3a-P16-clone2372	MW424135
			BankIt2414418 E1E2-gt3a-P16-clone2373	MW424136
			BankIt2414418 E1E2-gt3a-P16-clone2374	MW424137
			BankIt2414418 E1E2-gt3a-P16-clone2375	MW424138
			BankIt2414418 E1E2-gt3a-P16-clone2376	MW424139
			BankIt2414418 E1E2-gt3a-P16-clone2377	MW424140
			BankIt2414418 E1E2-gt3a-P16-clone2378	MW424141
			BankIt2414418 E1E2-gt3a-P16-clone2379	MW424142
			BankIt2414418 E1E2-gt3a-P16-clone2380	MW424143
			BankIt2414418 E1E2-gt3a-P16-clone2381	MW424144
			BankIt2414418 E1E2-gt3a-P16-clone2382	MW424145
			BankIt2414418 E1E2-gt3a-P16-clone2383	MW424146
			BankIt2414418 E1E2-gt3a-P16-clone2384	MW424147
			BankIt2414418 E1E2-gt3a-P16-clone2385	MW424148
			BankIt2414418 E1E2-gt3a-P16-clone2386	MW424149
			BankIt2414418 E1E2-gt3a-P16-clone2388	MW424150
			BankIt2414418 E1E2-gt3a-P16-clone2389	MW424151
			BankIt2414418 E1E2-gt3a-P16-clone2390	MW424152
			BankIt2414418 E1E2-gt3a-P16-clone2392	MW424153
			BankIt2414418 E1E2-gt3a-P16-clone2487	MW424154
			BankIt2414418 E1E2-gt3a-P16-clone2488	MW424155
			BankIt2414418 E1E2-gt3a-P16-clone2489	MW424156
			BankIt2414418 E1E2-gt3a-P16-clone2490	MW424157
			BankIt2414418 E1E2-gt3a-P16-clone2491	MW424158
			BankIt2414418 E1E2-gt3a-P16-clone2495	MW424159
			BankIt2414418 E1E2-gt3a-P16-clone2496	MW424160
			BankIt2414418 E1E2-gt3a-P16-clone2503	MW424161
			BankIt2414418 E1E2-gt3a-P16-clone2504	MW424162
			BankIt2414418 E1E2-gt3a-P16-clone2505	MW424163
			BankIt2414418 E1E2-gt3a-P16-clone2506	MW424164
			BankIt2414418 E1E2-gt3a-P16-clone2509	MW424165
			BankIt2414418 E1E2-gt3a-P16-clone2510	MW424166
			BankIt2414418 E1E2-gt3a-P16-clone2512	MW424167
			BankIt2414418 E1E2-gt3a-P16-clone2513	MW424168
			BankIt2414448 E1E2-gt3a-P17-clone1007	MW424169
			BankIt2414448 E1E2-gt3a-P17-clone1008	MW424170
			BankIt2414448 E1E2-gt3a-P17-clone1009	MW424171
			BankIt2414448 E1E2-gt3a-P17-clone1010	MW424172
			BankIt2414448 E1E2-gt3a-P17-clone1011	MW424173
			BankIt2414448 E1E2-gt3a-P17-clone1012	MW424174
			BankIt2414448 E1E2-gt3a-P17-clone1013	MW424175
			BankIt2414448 E1E2-gt3a-P17-clone1036	MW424176
			BankIt2414448 E1E2-gt3a-P17-clone1037	MW424177
			BankIt2414448 E1E2-gt3a-P17-clone1038	MW424178
			BankIt2414448 E1E2-gt3a-P17-clone1040	MW424179
			BankIt2414448 E1E2-gt3a-P17-clone1041	MW424180
			BankIt2414448 E1E2-gt3a-P17-clone1364	MW424181
			BankIt2414448 E1E2-gt3a-P17-clone1365	MW424182
			BankIt2414448 E1E2-gt3a-P17-clone1369	MW424183
			BankIt2414448 E1E2-gt3a-P17-clone1371	MW424184
			BankIt2414448 E1E2-gt3a-P17-clone1545	MW424185
			BankIt2414448 E1E2-gt3a-P17-clone2103	MW424186
			BankIt2414448 E1E2-gt3a-P17-clone2104	MW424187
			BankIt2414448 E1E2-gt3a-P17-clone2106	MW424188
			BankIt2414448 E1E2-gt3a-P17-clone2107	MW424189
			BankIt2414448 E1E2-gt3a-P17-clone2108	MW424190
			BankIt2414448 E1E2-gt3a-P17-clone2109	MW424191
			BankIt2414450 E1E2-gt1b-P18-clone1739	MW424192
			BankIt2414450 E1E2-gt1b-P18-clone2155	MW424193
			BankIt2414450 E1E2-gt1b-P18-clone2156	MW424194
			BankIt2414450 E1E2-gt1b-P18-clone2157	MW424195
			BankIt2414450 E1E2-gt1b-P18-clone2160	MW424196
			BankIt2414450 E1E2-gt1b-P18-clone2161	MW424197
			BankIt2414450 E1E2-gt1b-P18-clone2162	MW424198
			BankIt2414450 E1E2-gt1b-P18-clone2163	MW424199
			BankIt2414450 E1E2-gt1b-P18-clone2164	MW424200
			BankIt2414450 E1E2-gt1b-P18-clone2165	MW424201
			BankIt2414450 E1E2-gt1b-P18-clone2166	MW424202
			BankIt2414450 E1E2-gt1b-P18-clone2168	MW424203
			BankIt2414450 E1E2-gt1b-P18-clone2169	MW424204
			BankIt2414450 E1E2-gt1b-P18-clone2170	MW424205
			BankIt2414450 E1E2-gt1b-P18-clone2172	MW424206
			BankIt2414450 E1E2-gt1b-P18-clone2826	MW424207
			BankIt2414450 E1E2-gt1b-P18-clone2829	MW424208
			BankIt2414450 E1E2-gt1b-P18-clone2830	MW424209
			BankIt2414450 E1E2-gt1b-P18-clone2833	MW424210
			BankIt2414450 E1E2-gt1b-P18-clone2834	MW424211
			BankIt2414450 E1E2-gt1b-P18-clone2836	MW424212
			BankIt2414450 E1E2-gt1b-P18-clone2837	MW424213
			BankIt2414450 E1E2-gt1b-P18-clone2839	MW424214
			BankIt2414450 E1E2-gt1b-P18-clone2840	MW424215
			BankIt2414450 E1E2-gt1b-P18-clone2841	MW424216
			BankIt2414450 E1E2-gt1b-P18-clone2842	MW424217
			BankIt2414450 E1E2-gt1b-P18-clone2844	MW424218
			BankIt2414450 E1E2-gt1b-P18-clone2845	MW424219
			BankIt2414450 E1E2-gt1b-P18-clone2846	MW424220
			BankIt2414450 E1E2-gt1b-P18-clone2847	MW424221
			BankIt2414450 E1E2-gt1b-P18-clone2914	MW424222
			BankIt2414450 E1E2-gt1b-P18-clone2915	MW424223
			BankIt2414450 E1E2-gt1b-P18-clone2916	MW424224
			BankIt2414450 E1E2-gt1b-P18-clone2917	MW424225
			BankIt2414450 E1E2-gt1b-P18-clone2918	MW424226
			BankIt2414450 E1E2-gt1b-P18-clone2919	MW424227
			BankIt2414450 E1E2-gt1b-P18-clone2920	MW424228
			BankIt2414450 E1E2-gt1b-P18-clone2921	MW424229
			BankIt2414450 E1E2-gt1b-P18-clone2922	MW424230
			BankIt2414450 E1E2-gt1b-P18-clone2923	MW424231
			BankIt2414450 E1E2-gt1b-P18-clone2924	MW424232
			BankIt2414450 E1E2-gt1b-P18-clone2925	MW424233
			BankIt2414450 E1E2-gt1b-P18-clone2926	MW424234
			BankIt2414450 E1E2-gt1b-P18-clone2927	MW424235
			BankIt2414451 E1E2-gt1a-P32-clone1930	MW424236
			BankIt2414451 E1E2-gt1a-P32-clone1931	MW424237
			BankIt2414451 E1E2-gt1a-P32-clone1933	MW424238
			BankIt2414451 E1E2-gt1a-P32-clone1934	MW424239
			BankIt2414451 E1E2-gt1a-P32-clone1935	MW424240
			BankIt2414451 E1E2-gt1a-P32-clone1936	MW424241
			BankIt2414451 E1E2-gt1a-P32-clone1939	MW424242
			BankIt2414451 E1E2-gt1a-P32-clone1941	MW424243
			BankIt2414451 E1E2-gt1a-P32-clone1942	MW424244
			BankIt2414451 E1E2-gt1a-P32-clone1944	MW424245
			BankIt2414451 E1E2-gt1a-P32-clone1945	MW424246
			BankIt2414451 E1E2-gt1a-P32-clone1946	MW424247
			BankIt2414451 E1E2-gt1a-P32-clone1947	MW424248
			BankIt2414451 E1E2-gt1a-P32-clone1948	MW424249
			BankIt2414451 E1E2-gt1a-P32-clone1949	MW424250
			BankIt2414451 E1E2-gt1a-P32-clone1950	MW424251
			BankIt2414451 E1E2-gt1a-P32-clone1951	MW424252
			BankIt2414451 E1E2-gt1a-P32-clone1952	MW424253
			BankIt2414451 E1E2-gt1a-P32-clone1953	MW424254
			BankIt2414451 E1E2-gt1a-P32-clone1955	MW424255
			BankIt2414451 E1E2-gt1a-P32-clone2181	MW424256
			BankIt2414451 E1E2-gt1a-P32-clone2182	MW424257
			BankIt2414451 E1E2-gt1a-P32-clone2183	MW424258
			BankIt2414451 E1E2-gt1a-P32-clone2184	MW424259
			BankIt2414451 E1E2-gt1a-P32-clone2185	MW424260
			BankIt2414451 E1E2-gt1a-P32-clone2186	MW424261
			BankIt2414451 E1E2-gt1a-P32-clone2187	MW424262
			BankIt2414451 E1E2-gt1a-P32-clone2188	MW424263
			BankIt2414451 E1E2-gt1a-P32-clone2190	MW424264
			BankIt2414452 E1E2-gt1b-P08-2011-clone1756	MW424265
			BankIt2414452 E1E2-gt1b-P08-2011-clone1757	MW424266
			BankIt2414452 E1E2-gt1b-P08-2011-clone1758	MW424267
			BankIt2414452 E1E2-gt1b-P08-2011-clone1759	MW424268
			BankIt2414452 E1E2-gt1b-P08-2011-clone1760	MW424269
			BankIt2414452 E1E2-gt1b-P08-2011-clone1761	MW424270
			BankIt2414452 E1E2-gt1b-P08-2011-clone1762	MW424271
			BankIt2414452 E1E2-gt1b-P08-2011-clone1763	MW424272
			BankIt2414452 E1E2-gt1b-P08-2011-clone1764	MW424273
			BankIt2414452 E1E2-gt1b-P08-2011-clone1775	MW424274
			BankIt2414452 E1E2-gt1b-P08-2011-clone1776	MW424275
			BankIt2414452 E1E2-gt1b-P08-2011-clone1778	MW424276
			BankIt2414452 E1E2-gt1b-P08-2011-clone1779	MW424277
			BankIt2414452 E1E2-gt1b-P08-2011-clone1780	MW424278
			BankIt2414452 E1E2-gt1b-P08-2011-clone1782	MW424279
			BankIt2414452 E1E2-gt1b-P08-2011-clone1783	MW424280
			BankIt2414452 E1E2-gt1b-P08-2011-clone1784	MW424281
			BankIt2414452 E1E2-gt1b-P08-2011-clone1787	MW424282
			BankIt2414452 E1E2-gt1b-P08-2011-clone1788	MW424283
			BankIt2414452 E1E2-gt1b-P08-2011-clone1789	MW424284
			BankIt2414452 E1E2-gt1b-P08-2011-clone1790	MW424285
			BankIt2414452 E1E2-gt1b-P08-2011-clone1791	MW424286
			BankIt2414452 E1E2-gt1b-P08-2011-clone1792	MW424287
			BankIt2414452 E1E2-gt1b-P08-2011-clone1793	MW424288
			BankIt2414452 E1E2-gt1b-P08-2011-clone1794	MW424289
			BankIt2414452 E1E2-gt1b-P08-2011-clone1795	MW424290
			BankIt2414452 E1E2-gt1b-P08-2011-clone1798	MW424291
			BankIt2414452 E1E2-gt1b-P08-2011-clone1799	MW424292
			BankIt2414452 E1E2-gt1b-P08-2011-clone1800	MW424293
			BankIt2414452 E1E2-gt1b-P08-2011-clone1801	MW424294
			BankIt2414452 E1E2-gt1b-P08-2011-clone1802	MW424295
			BankIt2414452 E1E2-gt1b-P08-2011-clone1803	MW424296
			BankIt2414452 E1E2-gt1b-P08-2011-clone1804	MW424297
			BankIt2414452 E1E2-gt1b-P08-2011-clone1807	MW424298
			BankIt2414452 E1E2-gt1b-P08-2011-clone1809	MW424299
			BankIt2414452 E1E2-gt1b-P08-2011-clone1811	MW424300
			BankIt2414452 E1E2-gt1b-P08-2011-clone2198	MW424301
			BankIt2414452 E1E2-gt1b-P08-2011-clone2199	MW424302
			BankIt2414452 E1E2-gt1b-P08-2011-clone2200	MW424303
			BankIt2414452 E1E2-gt1b-P08-2011-clone2201	MW424304
			BankIt2414452 E1E2-gt1b-P08-2011-clone2202	MW424305
			BankIt2414452 E1E2-gt1b-P08-2011-clone2203	MW424306
			BankIt2414452 E1E2-gt1b-P08-2011-clone2204	MW424307
			BankIt2414452 E1E2-gt1b-P08-2011-clone2205	MW424308
			BankIt2414452 E1E2-gt1b-P08-2011-clone2206	MW424309
			BankIt2414452 E1E2-gt1b-P08-2011-clone2323	MW424310
			BankIt2414452 E1E2-gt1b-P08-2011-clone2324	MW424311
			BankIt2414452 E1E2-gt1b-P08-2011-clone2325	MW424312
			BankIt2414452 E1E2-gt1b-P08-2011-clone2326	MW424313
			BankIt2414452 E1E2-gt1b-P08-2011-clone2327	MW424314
			BankIt2414452 E1E2-gt1b-P08-2011-clone2329	MW424315
			BankIt2414452 E1E2-gt1b-P08-2011-clone2330	MW424316
			BankIt2414452 E1E2-gt1b-P08-2011-clone2331	MW424317
			BankIt2414452 E1E2-gt1b-P08-2011-clone2332	MW424318
			BankIt2414452 E1E2-gt1b-P08-2011-clone2333	MW424319
			BankIt2414452 E1E2-gt1b-P08-2011-clone2334	MW424320
			BankIt2414452 E1E2-gt1b-P08-2011-clone2335	MW424321
			BankIt2414452 E1E2-gt1b-P08-2011-clone2336	MW424322
			BankIt2414452 E1E2-gt1b-P08-2011-clone2337	MW424323
			BankIt2414452 E1E2-gt1b-P08-2011-clone2338	MW424324
			BankIt2414452 E1E2-gt1b-P08-2011-clone2339	MW424325
			BankIt2414452 E1E2-gt1b-P08-2011-clone2340	MW424326
			BankIt2414452 E1E2-gt1b-P08-2011-clone2341	MW424327
			BankIt2414452 E1E2-gt1b-P08-2011-clone2344	MW424328
			BankIt2414452 E1E2-gt1b-P08-2011-clone2884	MW424329
			BankIt2414452 E1E2-gt1b-P08-2011-clone2885	MW424330
			BankIt2414452 E1E2-gt1b-P08-2011-clone2886	MW424331
			BankIt2414452 E1E2-gt1b-P08-2011-clone2887	MW424332
			BankIt2414452 E1E2-gt1b-P08-2011-clone2888	MW424333
			BankIt2414452 E1E2-gt1b-P08-2011-clone2889	MW424334
			BankIt2414452 E1E2-gt1b-P08-2011-clone2890	MW424335
			BankIt2414452 E1E2-gt1b-P08-2011-clone2891	MW424336
			BankIt2414452 E1E2-gt1b-P08-2011-clone2892	MW424337
			BankIt2414452 E1E2-gt1b-P08-2011-clone2893	MW424338
			BankIt2414452 E1E2-gt1b-P08-2011-clone2894	MW424339
			BankIt2414452 E1E2-gt1b-P08-2011-clone2895	MW424340
			BankIt2414452 E1E2-gt1b-P08-2011-clone2896	MW424341
			BankIt2414452 E1E2-gt1b-P08-2011-clone2897	MW424342
			BankIt2414452 E1E2-gt1b-P08-2011-clone2898	MW424343
			BankIt2414452 E1E2-gt1b-P08-2011-clone2901	MW424344
			BankIt2414452 E1E2-gt1b-P08-2011-clone2902	MW424345
			BankIt2414452 E1E2-gt1b-P08-2011-clone2904	MW424346
			BankIt2414452 E1E2-gt1b-P08-2011-clone2905	MW424347
			BankIt2414452 E1E2-gt1b-P08-2011-clone2906	MW424348
			BankIt2414452 E1E2-gt1b-P08-2011-clone2907	MW424349
			BankIt2414452 E1E2-gt1b-P08-2011-clone2908	MW424350
			BankIt2414452 E1E2-gt1b-P08-2011-clone2909	MW424351
			BankIt2414452 E1E2-gt1b-P08-2011-clone2910	MW424352
			BankIt2414452 E1E2-gt1b-P08-2011-clone2911	MW424353
			BankIt2414452 E1E2-gt1b-P08-2011-clone2912	MW424354
			BankIt2414452 E1E2-gt1b-P08-2011-clone2913	MW424355
			BankIt2414452 E1E2-gt1b-P08-2011-clone3001	MW424356
			BankIt2414452 E1E2-gt1b-P08-2011-clone3002	MW424357
			BankIt2414452 E1E2-gt1b-P08-2011-clone3003	MW424358
			BankIt2414452 E1E2-gt1b-P08-2011-clone3004	MW424359
			BankIt2414452 E1E2-gt1b-P08-2011-clone3005	MW424360
			BankIt2414452 E1E2-gt1b-P08-2011-clone3006	MW424361
			BankIt2414452 E1E2-gt1b-P08-2011-clone3007	MW424362
			BankIt2414452 E1E2-gt1b-P08-2011-clone3008	MW424363
			BankIt2414452 E1E2-gt1b-P08-2011-clone3009	MW424364
			BankIt2414452 E1E2-gt1b-P08-2011-clone3010	MW424365
			BankIt2414452 E1E2-gt1b-P08-2011-clone3011	MW424366
			BankIt2414452 E1E2-gt1b-P08-2011-clone3012	MW424367
			BankIt2414452 E1E2-gt1b-P08-2011-clone3013	MW424368
			BankIt2414452 E1E2-gt1b-P08-2011-clone3014	MW424369
			BankIt2414452 E1E2-gt1b-P08-2011-clone3015	MW424370
			BankIt2414452 E1E2-gt1b-P08-2011-clone3016	MW424371
			BankIt2414452 E1E2-gt1b-P08-2011-clone3018	MW424372
			BankIt2414452 E1E2-gt1b-P08-2011-clone3019	MW424373
			BankIt2406699 E1E2-gt1a-P01-clone190	MW404177
			BankIt2406699 E1E2-gt1a-P01-clone191	MW404178
			BankIt2406699 E1E2-gt1a-P01-clone192	MW404179
			BankIt2406699 E1E2-gt1a-P01-clone195	MW404180
			BankIt2406699 E1E2-gt1a-P01-clone196	MW404181
			BankIt2406699 E1E2-gt1a-P01-clone197	MW404182
			BankIt2406699 E1E2-gt1a-P01-clone199	MW404183
			BankIt2406699 E1E2-gt1a-P01-clone200	MW404184
			BankIt2406699 E1E2-gt1a-P01-clone201	MW404185
			BankIt2406699 E1E2-gt1a-P01-clone202	MW404186
			BankIt2406699 E1E2-gt1a-P01-clone203	MW404187
			BankIt2406699 E1E2-gt1a-P01-clone204	MW404188
			BankIt2406699 E1E2-gt1a-P01-clone205	MW404189
			BankIt2406699 E1E2-gt1a-P01-clone209	MW404190
			BankIt2406699 E1E2-gt1a-P01-clone229	MW404191
			BankIt2406699 E1E2-gt1a-P01-clone231	MW404192
			BankIt2406699 E1E2-gt1a-P01-clone236	MW404193
